# Supplementary material for: Early Holocene cold snaps and their expression in the moraine record of the eastern European Alps
Source: Copernicus journal article supplement (doi:10.5194/cp-17-2451-2021), 2021-12-02
Supplement: Supplementary file 1 [file cp-17-2451-2021-supplement.pdf]

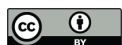

## *Supplement of*

# **Early Holocene cold snaps and their expression in the moraine record of the eastern European Alps**

**Sandra M. Braumann et al.**

*Correspondence to:* Sandra M. Braumann ([sandra.braumann@boku.ac.at](mailto:sandra.braumann@boku.ac.at))

The copyright of individual parts of the supplement might differ from the article licence.

## CONTENT

|                                                                                                    |            |
|----------------------------------------------------------------------------------------------------|------------|
| <b>S1   Quartz content in rock samples</b>                                                         | <b>p2</b>  |
| <b>S2   Organization of <math>^{10}\text{Be}</math> sample batches including procedural blanks</b> | <b>p3</b>  |
| <b>S3   Sensitivity test: boulder surface erosion</b>                                              | <b>p5</b>  |
| <b>S4   Reduced <math>\chi^2</math> test</b>                                                       | <b>p6</b>  |
| <b>S5   Sample documentation</b>                                                                   |            |
| Jamtal samples (JAM)                                                                               | <b>p7</b>  |
| Laraintal samples (LAR)                                                                            | <b>p18</b> |
| <b>References</b>                                                                                  | <b>p34</b> |

## S1 | QUARTZ CONTENT IN ROCK SAMPLES

**Table S 1:** Quartz yields of rock samples collected from Jamtal (JAM) and Laraintal (LAR); values range between 0.3 and 26.1% with a median of 4.1%.

| Sample name | Start weight [g] | Quartz Yield [g] | Quartz Yield [%] |
|-------------|------------------|------------------|------------------|
| JAM-18-01   | 538              | 31.34            | 5.8%             |
| JAM-18-02   | 765              | 11.68            | 1.5%             |
| JAM-18-03   | 785              | 7.36             | 0.9%             |
| JAM-18-04   | 613              | 20.43            | 3.3%             |
| JAM-18-06   | 613              | 23.03            | 3.8%             |
| JAM-18-07   | 797              | 12.01            | 1.5%             |
| JAM-18-16   | 663              | 25.24            | 3.8%             |
| JAM-18-17   | 411              | 10.69            | 2.6%             |
| JAM-18-18   | 605              | 23.65            | 3.9%             |
| JAM-19-21   | 926              | 31.28            | 3.4%             |
| JAM-19-22   | 683              | 29.33            | 4.3%             |
| LAR-18-03   | 477              | 24.02            | 5.0%             |
| LAR-18-09   | 918              | 19.01            | 2.1%             |
| LAR-18-10   | 675              | 7.09             | 1.1%             |
| LAR-19-12   | 493              | 116.01           | 23.5%            |
| LAR-19-13   | 537              | 25.09            | 4.7%             |
| LAR-19-14   | 692              | 2.74             | 0.4%             |
| LAR-19-15   | 1001             | 79.72            | 8.0%             |
| LAR-19-16   | 989              | 2.64             | 0.3%             |
| LAR-19-17   | 834              | 69.92            | 8.4%             |
| LAR-19-18   | 385              | 70.51            | 18.3%            |
| LAR-19-19   | 517              | 78.5             | 15.2%            |
| LAR-19-20   | 677              | 63.91            | 9.4%             |
| LAR-19-21   | 906              | 30.01            | 3.3%             |
| LAR-19-22   | 368              | 29.33            | 8.0%             |
| LAR-19-23   | 717              | 42.41            | 5.9%             |
| LAR-19-24   | 535              | 139.82           | 26.1%            |
|             |                  | Maximum          | 26.1%            |
|             |                  | Minimum          | 0.3%             |
|             |                  | Median           | 3.9%             |

## S2 | ORGANIZATION OF <sup>10</sup>Be SAMPLE BATCHES INCLUDING PROCEDURAL BLANKS

**Table S 2:** A total of 27 rock samples was processed according to the LDEO protocol (Braumann et al., 2020; Schaefer et al., 2009). Samples were processed in four batches, each of them including two to three procedural blanks (in blue font). The number of atoms counted in blanks that were processed with each batch were subtracted from the total number of atoms in each sample of the same batch. If two blanks were available (batches 3, 4 and 5), the average of both blanks was used for blank correction. An exception is batch 6: LAR-19-23 (c. 30 g) required a larger amount of HF compared to the other samples in the batch (c. 150 ml vs c. 50 ml for the rest of the samples). Therefore, an extra blank with the same HF-volume was processed and used for the correction of LAR-19-23. BLK-2 of batch 6 was spiked with Fe to quantify the background in samples LAR-19-14 and LAR-19-16 (highlighted in brown). BLK-3 represents the background of the rest of the samples. Blank correction ranged from 0.1% to 6.5% depending on the total number of <sup>10</sup>Be atoms in the samples. Concentrations of the LDEO <sup>9</sup>Be carriers are corrected for evaporation.

| Batch # | Sample ID      | <sup>10</sup> Be/ <sup>9</sup> Be AMS ratio | 1σ anal. unc.<br><sup>10</sup> Be/ <sup>9</sup> Be AMS ratio | 1σ anal. unc.<br><sup>10</sup> Be/ <sup>9</sup> Be AMS ratio [%] | Counted <sup>10</sup> Be atoms<br>[atoms/sample] | 1σ anal. unc.<br><sup>10</sup> Be/ <sup>9</sup> Be<br>[atoms/sample] | Blank correction<br>[%] | Carrier &<br>Concentration<br>[ppm] |
|---------|----------------|---------------------------------------------|--------------------------------------------------------------|------------------------------------------------------------------|--------------------------------------------------|----------------------------------------------------------------------|-------------------------|-------------------------------------|
| 3       | Blk1_2019May23 | 8.36E-16                                    | 2.09E-16                                                     | 25.0%                                                            | 10270                                            | 2570                                                                 | -                       | Carrier 7<br>1028                   |
|         | Blk2_2019May23 | 6.18E-16                                    | 1.72E-16                                                     | 27.8%                                                            | 7690                                             | 2140                                                                 | -                       |                                     |
|         | JAM-18-01      | 6.70E-13                                    | 1.22E-14                                                     | 1.8%                                                             | 8250920                                          | 149650                                                               | 0.1%                    |                                     |
|         | JAM-18-04      | 4.25E-13                                    | 7.88E-15                                                     | 1.9%                                                             | 5196240                                          | 96270                                                                | 0.2%                    |                                     |
|         | JAM-18-07      | 4.59E-14                                    | 1.52E-15                                                     | 3.3%                                                             | 572360                                           | 18940                                                                | 1.6%                    |                                     |
|         | JAM-18-16      | 6.51E-14                                    | 1.37E-15                                                     | 2.1%                                                             | 804960                                           | 17000                                                                | 1.1%                    |                                     |
|         | JAM-18-18      | 1.30E-14                                    | 7.07E-16                                                     | 5.4%                                                             | 161890                                           | 8780                                                                 | 5.5%                    |                                     |
|         | LAR-18-03      | 4.03E-13                                    | 7.47E-15                                                     | 1.9%                                                             | 5004560                                          | 92710                                                                | 0.2%                    |                                     |
|         | LAR-18-09      | 3.51E-13                                    | 6.16E-15                                                     | 1.8%                                                             | 4340820                                          | 76280                                                                | 0.2%                    |                                     |
| 4       | BLK1-2019June6 | 4.32E-16                                    | 1.44E-16                                                     | 33.4%                                                            | 5355                                             | 1786                                                                 | -                       | Carrier 7<br>1030                   |
|         | BLK2-2019June6 | 2.81E-16                                    | 9.95E-17                                                     | 35.4%                                                            | 3492                                             | 1236                                                                 | -                       |                                     |
|         | JAM-18-02      | 2.54E-13                                    | 4.13E-15                                                     | 1.6%                                                             | 3151010                                          | 51230                                                                | 0.1%                    |                                     |
|         | JAM-18-03      | 1.65E-13                                    | 3.08E-15                                                     | 1.9%                                                             | 2045060                                          | 38160                                                                | 0.2%                    |                                     |
|         | JAM-18-06      | 7.00E-15                                    | 8.79E-16                                                     | 12.6%                                                            | 86600                                            | 10880                                                                | 5.1%                    |                                     |
|         | JAM-18-17      | 5.47E-15                                    | 6.82E-16                                                     | 12.5%                                                            | 67820                                            | 8460                                                                 | 6.5%                    |                                     |
|         | LAR-18-10      | 1.12E-13                                    | 2.11E-15                                                     | 1.9%                                                             | 1404080                                          | 26340                                                                | 0.3%                    |                                     |



| Batch # | Sample ID      | $^{10}\text{Be}/^9\text{Be}$ AMS ratio | 1 $\sigma$ anal. unc.<br>$^{10}\text{Be}/^9\text{Be}$ AMS ratio | 1 $\sigma$ anal. unc.<br>$^{10}\text{Be}/^9\text{Be}$ AMS ratio [%] | Counted $^{10}\text{Be}$ atoms<br>[atoms/sample] | 1 $\sigma$ anal. unc.<br>$^{10}\text{Be}/^9\text{Be}$<br>[atoms/sample] | Blank correction<br>[%] | Carrier &<br>Concentration<br>[ppm] |
|---------|----------------|----------------------------------------|-----------------------------------------------------------------|---------------------------------------------------------------------|--------------------------------------------------|-------------------------------------------------------------------------|-------------------------|-------------------------------------|
| 5       | BLK1-2020Jan17 | 4.00E-16                               | 1.00E-16                                                        | 25.0%                                                               | 4858                                             | 1214                                                                    | -                       | Carrier 7<br>1030                   |
|         | BLK2-2020Jan17 | 4.10E-16                               | 1.14E-16                                                        | 27.7%                                                               | 5013                                             | 1389                                                                    | -                       |                                     |
|         | LAR-19-12      | 2.08E-13                               | 3.34E-15                                                        | 1.6%                                                                | 2536340                                          | 40710                                                                   | 0.2%                    |                                     |
|         | LAR-19-13      | 2.22E-13                               | 4.11E-15                                                        | 1.9%                                                                | 2676390                                          | 49580                                                                   | 0.2%                    |                                     |
|         | LAR-19-15      | 2.11E-13                               | 3.90E-15                                                        | 1.9%                                                                | 2561640                                          | 47470                                                                   | 0.2%                    |                                     |
|         | LAR-19-17      | 1.95E-13                               | 3.61E-15                                                        | 1.9%                                                                | 2366110                                          | 43840                                                                   | 0.2%                    |                                     |
|         | LAR-19-18      | 2.08E-13                               | 5.36E-15                                                        | 2.6%                                                                | 2520430                                          | 65070                                                                   | 0.2%                    |                                     |
|         | LAR-19-19      | 1.87E-13                               | 3.47E-15                                                        | 1.9%                                                                | 2319930                                          | 42980                                                                   | 0.2%                    |                                     |
|         | LAR-19-20      | 2.02E-13                               | 3.75E-15                                                        | 1.9%                                                                | 2460270                                          | 45620                                                                   | 0.2%                    |                                     |
|         | LAR-19-21      | 1.89E-13                               | 3.51E-15                                                        | 1.9%                                                                | 2281230                                          | 42290                                                                   | 0.2%                    |                                     |
|         | LAR-19-22      | 1.93E-13                               | 3.58E-15                                                        | 1.9%                                                                | 2335410                                          | 43280                                                                   | 0.2%                    |                                     |
| 6       | BLK1-2020Jan30 | 5.60E-16                               | 1.14E-16                                                        | 20.4%                                                               | 6730                                             | 1370                                                                    | -                       | Carrier 7<br>1032                   |
|         | BLK2-2020Jan31 | 9.11E-16                               | 1.86E-16                                                        | 20.4%                                                               | 6330                                             | 1290                                                                    | -                       |                                     |
|         | BLK3-2020Jan31 | 5.05E-16                               | 1.46E-16                                                        | 28.9%                                                               | 6240                                             | 1800                                                                    | -                       |                                     |
|         | JAM-19-21      | 2.18E-13                               | 4.08E-15                                                        | 1.9%                                                                | 2703360                                          | 50630                                                                   | 0.2%                    |                                     |
|         | JAM-19-22      | 2.21E-13                               | 2.75E-15                                                        | 1.2%                                                                | 2739710                                          | 34110                                                                   | 0.2%                    |                                     |
|         | LAR-19-14      | 1.00E-13                               | 2.51E-15                                                        | 2.5%                                                                | 686210                                           | 17190                                                                   | 0.9%                    |                                     |
|         | LAR-19-16      | 9.01E-14                               | 1.80E-15                                                        | 2.0%                                                                | 627350                                           | 12550                                                                   | 1.0%                    |                                     |
|         | LAR-19-23      | 4.20E-14                               | 9.61E-16                                                        | 2.3%                                                                | 507590                                           | 11630                                                                   | 1.3%                    |                                     |
|         | LAR-19-24      | 2.24E-13                               | 4.19E-15                                                        | 1.9%                                                                | 2767560                                          | 51800                                                                   | 0.2%                    |                                     |
|         | Blank min.     | 2.81E-16                               |                                                                 |                                                                     |                                                  |                                                                         |                         |                                     |
|         | Blank max.     | 9.11E-16                               |                                                                 |                                                                     |                                                  |                                                                         |                         |                                     |

### S3 | SENSITIVITY TEST: BOULDER SURFACE EROSION

**Table S3:** Comparison between ages calculated without any erosion rate correction and ages calculated using an erosion rate of 1 mm/ka often used on the Holocene time scale. Uncorrected ages are at maximum 1% younger than corrected ages.

| Sample name | <sup>10</sup> Be Ages w/o erosion |                      | <sup>10</sup> Be Ages with erosion<br>(1 mm/ka) |                      | Difference<br>[%] |
|-------------|-----------------------------------|----------------------|-------------------------------------------------|----------------------|-------------------|
|             | Age<br>[yrs]                      | Uncertainty<br>[yrs] | Age<br>[yrs]                                    | Uncertainty<br>[yrs] |                   |
| JAM-18-01   | 11020                             | 200                  | 11120                                           | 200                  | 0.9%              |
| JAM-18-02   | 11280                             | 180                  | 11380                                           | 190                  | 0.9%              |
| JAM-18-03   | 11850                             | 220                  | 11950                                           | 230                  | 0.8%              |
| JAM-18-04   | 10680                             | 200                  | 10770                                           | 200                  | 0.8%              |
| JAM-18-06   | 270                               | 30                   | 270                                             | 30                   | 0.0%              |
| JAM-18-07   | 1500                              | 50                   | 1500                                            | 50                   | 0.0%              |
| JAM-18-16   | 1070                              | 20                   | 1070                                            | 20                   | 0.0%              |
| JAM-18-17   | 240                               | 30                   | 240                                             | 30                   | 0.0%              |
| JAM-18-18   | 270                               | 20                   | 270                                             | 20                   | 0.0%              |
| JAM-19-21   | 10920                             | 210                  | 11010                                           | 210                  | 0.8%              |
| JAM-19-22   | 10660                             | 130                  | 10740                                           | 140                  | 0.8%              |
| LAR-18-03   | 10160                             | 190                  | 10240                                           | 190                  | 0.8%              |
| LAR-18-09   | 11540                             | 200                  | 11650                                           | 210                  | 1.0%              |
| LAR-18-10   | 10880                             | 210                  | 10970                                           | 210                  | 0.8%              |
| LAR-19-12   | 10890                             | 180                  | 10980                                           | 180                  | 0.8%              |
| LAR-19-13   | 11120                             | 210                  | 11220                                           | 210                  | 0.9%              |
| LAR-19-14   | 11200                             | 280                  | 11310                                           | 290                  | 1.0%              |
| LAR-19-15   | 10860                             | 200                  | 10950                                           | 210                  | 0.8%              |
| LAR-19-16   | 11060                             | 220                  | 11170                                           | 230                  | 1.0%              |
| LAR-19-17   | 11070                             | 210                  | 11170                                           | 210                  | 0.9%              |
| LAR-19-18   | 11330                             | 290                  | 11430                                           | 300                  | 0.9%              |
| LAR-19-19   | 10730                             | 200                  | 10820                                           | 200                  | 0.8%              |
| LAR-19-20   | 11480                             | 210                  | 11580                                           | 220                  | 0.9%              |
| LAR-19-21   | 10660                             | 200                  | 10750                                           | 200                  | 0.8%              |
| LAR-19-22   | 11210                             | 210                  | 11310                                           | 210                  | 0.9%              |
| LAR-19-23   | 700                               | 20                   | 700                                             | 20                   | 0.0%              |
| LAR-19-24   | 10930                             | 210                  | 11030                                           | 210                  | 0.9%              |
|             |                                   |                      |                                                 | Maximum              | 1.0%              |
|             |                                   |                      |                                                 | Median               | 0.8%              |

## S4 | REDUCED $\chi^2$ -TEST

A reduced  $\chi^2$ -test (chi-squared) statistic (Equation 1) is performed to assess whether the variance in group measurements can be explained by analytical errors alone (Balco, 2011). If  $\chi^2_R \sim 1$ , uncertainties are within the expected range, which indicates that age scatter is due to analytical errors. If  $\chi^2_R < 1$ , uncertainties are likely overestimated.  $\chi^2_R > 1$  points to one or multiple additional causes other than analytical uncertainties responsible for age scatter among samples. Calculating  $\chi^2_R$  for all samples whose ages fall into the Early Holocene (Table S 3) gives a value of 3.43, suggesting that age variability among JR3/L3 and JR4/L4 moraines is not purely owed to analytical measurement errors.

$$\chi^2_R = \frac{1}{n-1} \sum_{i=1}^n \left[ \frac{t_i - \bar{t}_i}{\sigma t_i} \right]^2 \quad \text{Equation 1}$$

$n \dots$  number of samples  
 $t_i \dots$  calculated boulder ages  
 $\bar{t}_i \dots$  average of calculated boulder ages  
 $\sigma t_i \dots$  uncertainties of boulder ages

**Table S 4:** List of all boulder samples that date to the Early Holocene, based upon which the reduced  $\chi^2$  statistic was calculated. Boulder ages ( $t_i$ ) and analytical uncertainties ( $\sigma t_i$ ) are not rounded.

| Landform  | Sample ID | $t_i$       | $\sigma t_i$ |
|-----------|-----------|-------------|--------------|
| Moraine 3 | LAR-18-09 | 11541       | 203          |
|           | LAR-19-17 | 11068       | 206          |
|           | LAR-19-18 | 11328       | 293          |
|           | LAR-19-19 | 10728       | 199          |
|           | LAR-19-20 | 11477       | 213          |
|           | LAR-19-13 | 11118       | 207          |
|           | LAR-19-14 | 11202       | 281          |
|           | LAR-19-22 | 11207       | 208          |
|           | LAR-19-24 | 10932       | 205          |
|           | JAM-18-01 | 11018       | 200          |
|           | JAM-18-02 | 11280       | 184          |
|           | JAM-18-03 | 11845       | 222          |
| Moraine 4 | LAR-18-03 | 10161       | 189          |
|           | LAR-18-10 | 10881       | 205          |
|           | LAR-19-21 | 10657       | 198          |
|           | LAR-19-12 | 10885       | 175          |
|           | LAR-19-15 | 10859       | 202          |
|           | LAR-19-16 | 11063       | 222          |
|           | JAM-18-04 | 10678       | 198          |
|           | JAM-19-21 | 10915       | 205          |
|           | JAM-19-22 | 10656       | 133          |
|           |           | $n$         | 21           |
|           |           | $\bar{t}_i$ | 11024        |
|           |           | $\chi^2_R$  | 3.43         |

JAM-18-01

 $^{10}\text{Be}$  exposure age:  $11,020 \pm 200$  yrs

COORDINATES N 46.8766 | E 10.1736  
ALTITUDE 2350 m  
L x B x H 8.0 x 2.5 x 3.0 m<sup>3</sup>

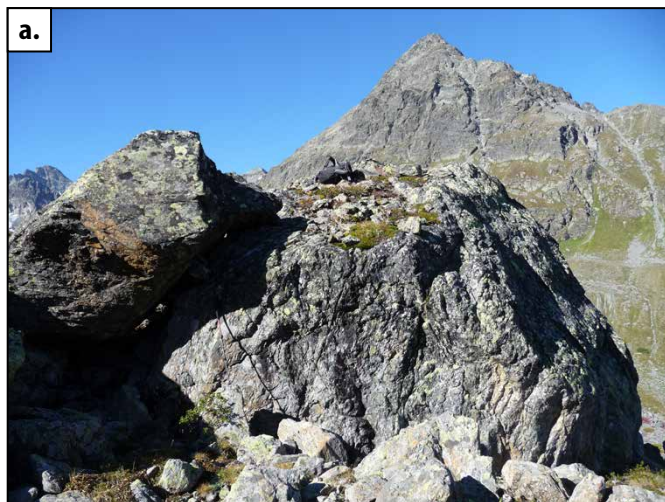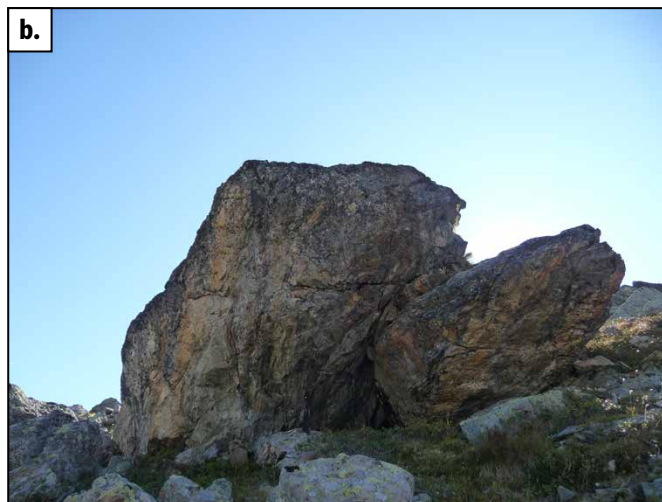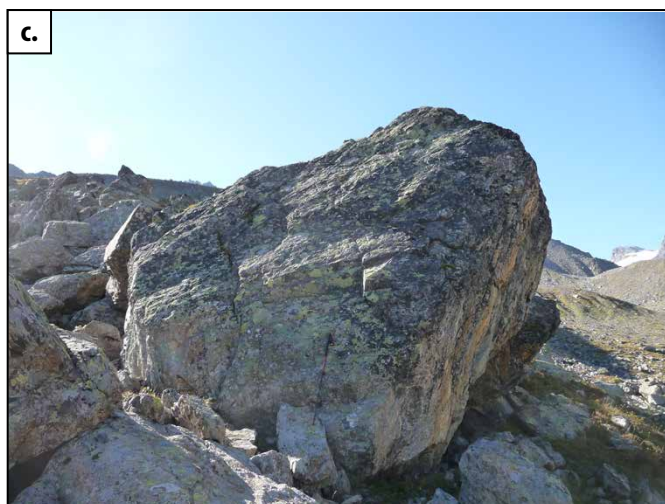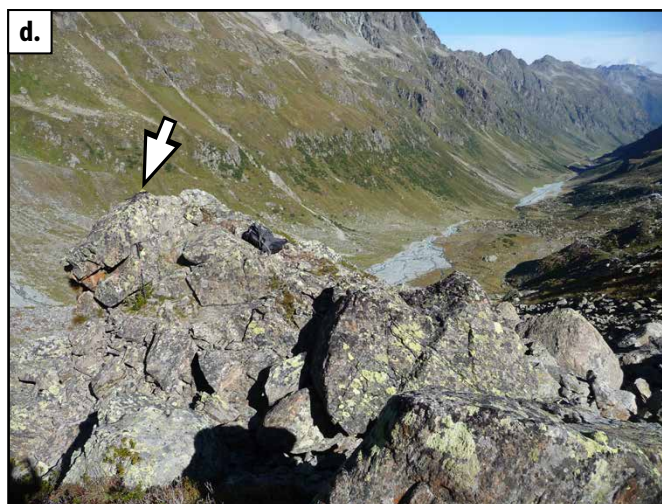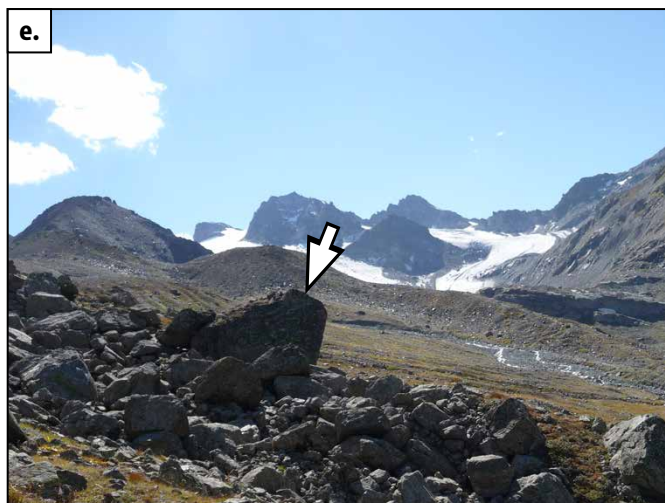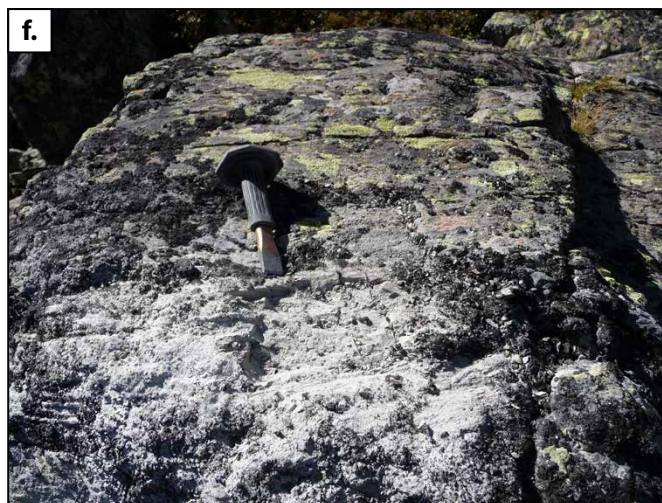

**Figure S1: JAM-18-01. a. View towards W. b. View towards E. c. View towards S. d. View towards NW. e. View towards S with Jamtalfener in the background. f. Sampled rock surface.**



COORDINATES N 46.8767 | E 10.1735  
ALTITUDE 2339 m  
L x B x H 6.0 x 6.0 x 4.0 m<sup>3</sup>

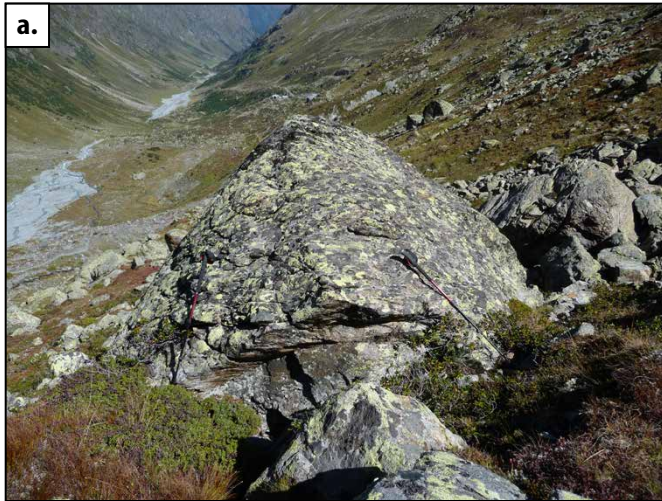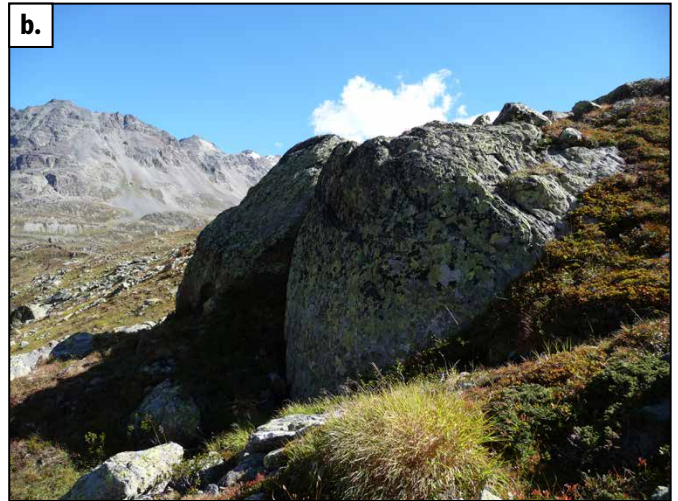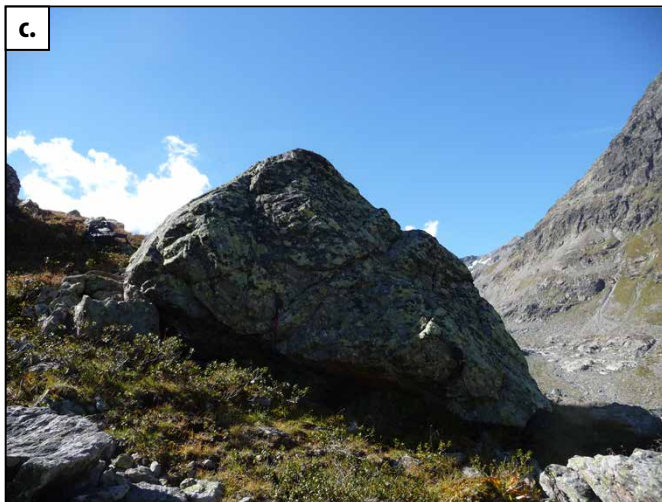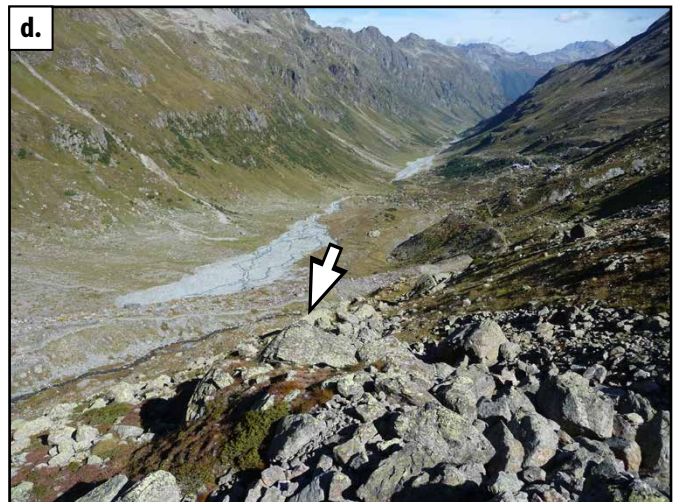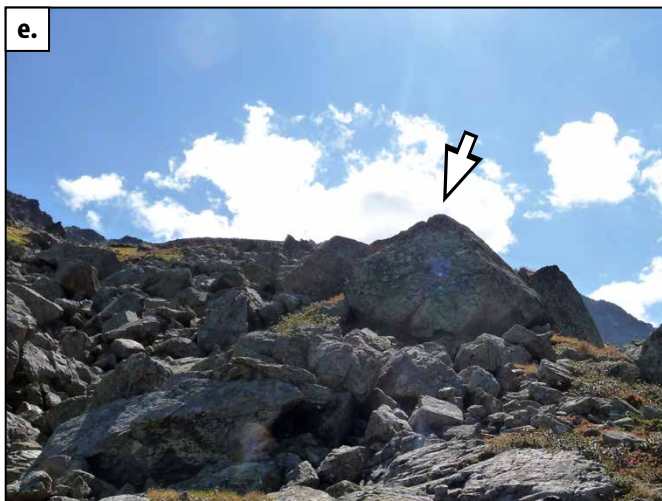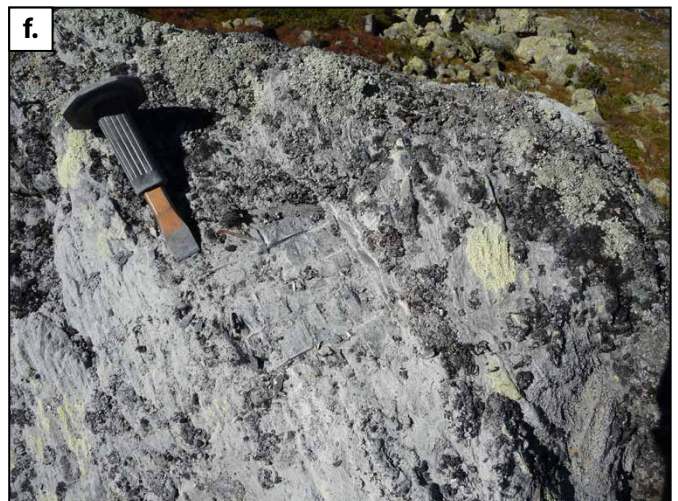

**Figure S2: JAM-18-02. a. View towards N. b. View towards NE. c. View towards S. d. View towards NW; sampled boulder indicated with arrow. e. View towards SE. f. Sampled rock surface.**



COORDINATES N 46.8770 | E 10.1734  
ALTITUDE 2328 m  
L x B x H 2.1 x 1.9 x 1.2 m<sup>3</sup>

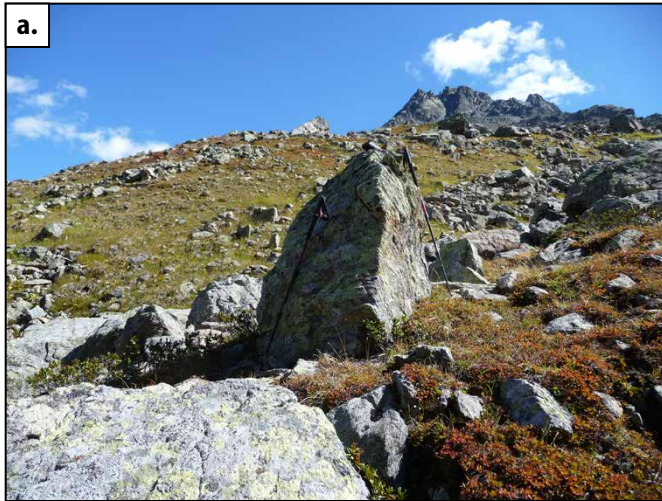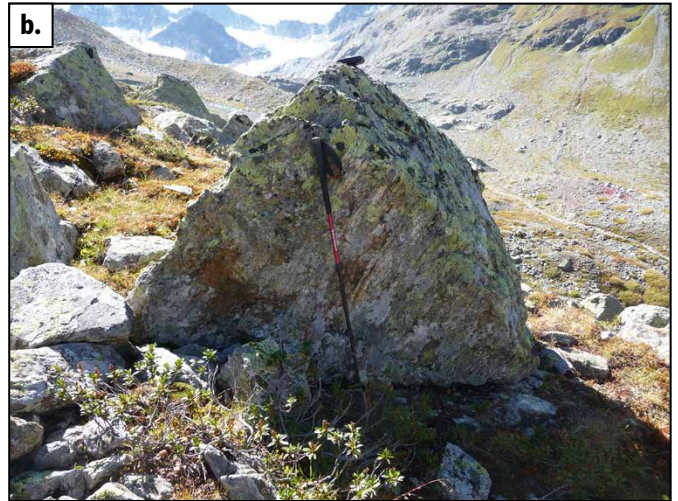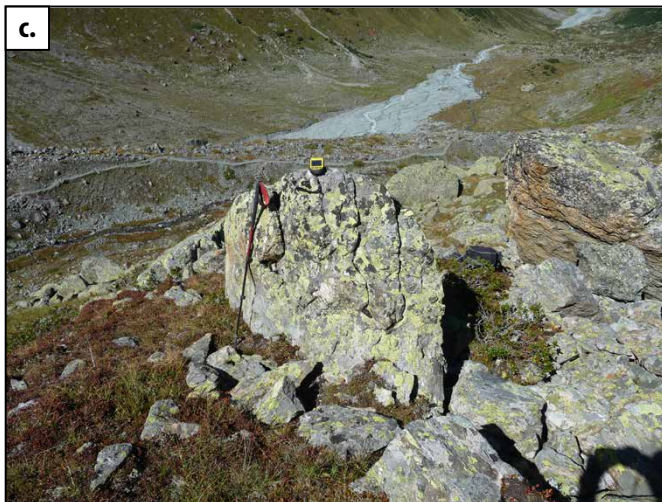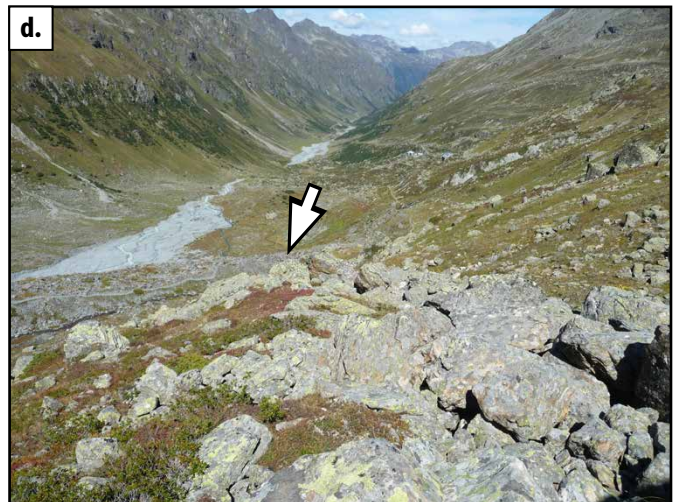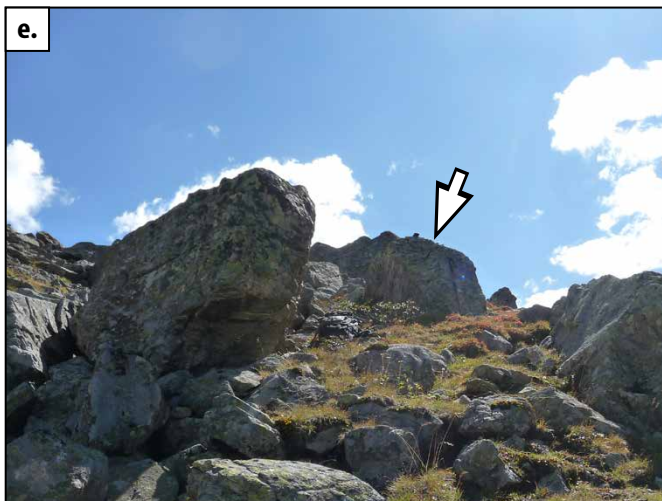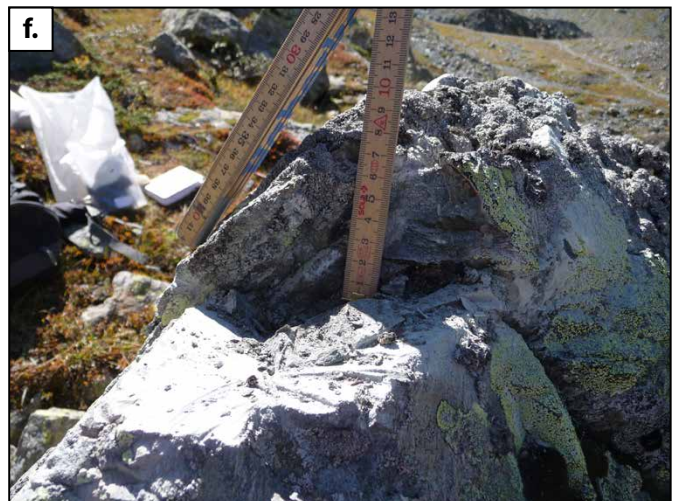

**Figure S3: JAM-18-03. a. View towards E. b. View towards S. c. View towards NW. d. View towards NNW. e. View towards SE. f. Sampled rock surface.**



COORDINATES N 46.8771 | E 10.1739  
ALTITUDE 2335 m  
L x B x H 3.6 x 1.7 x 1.2 m

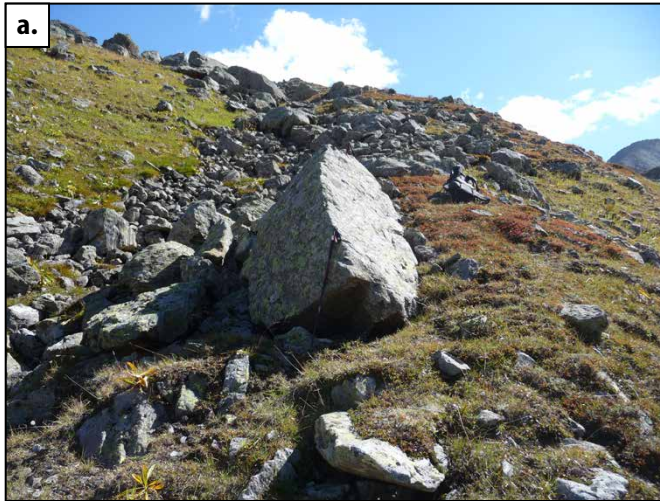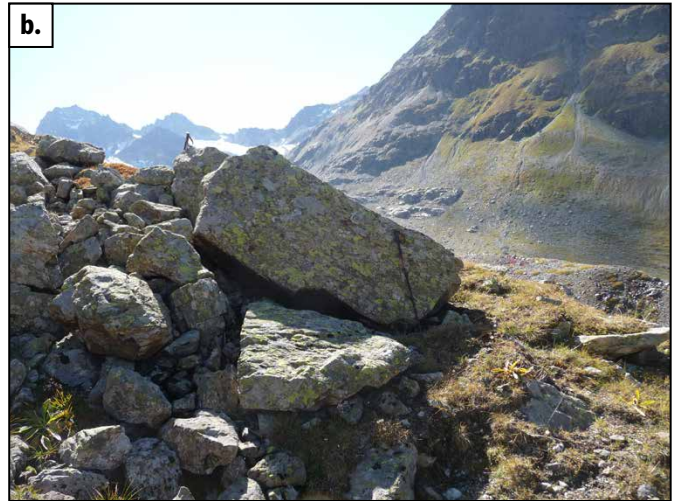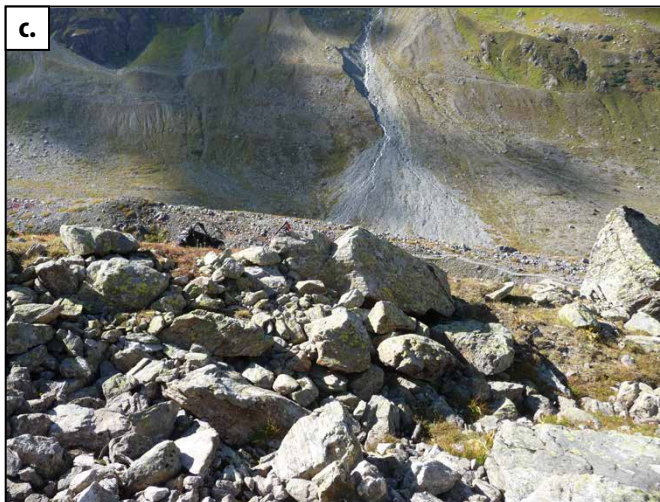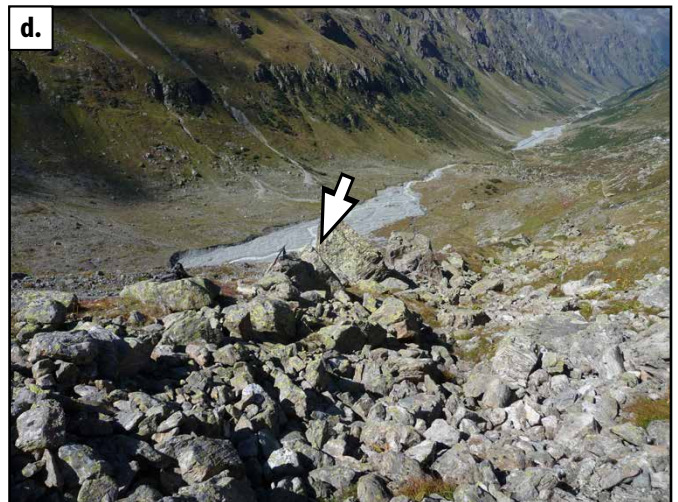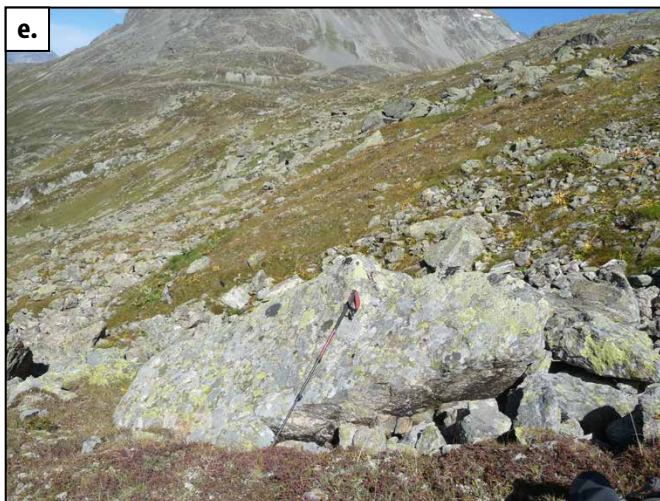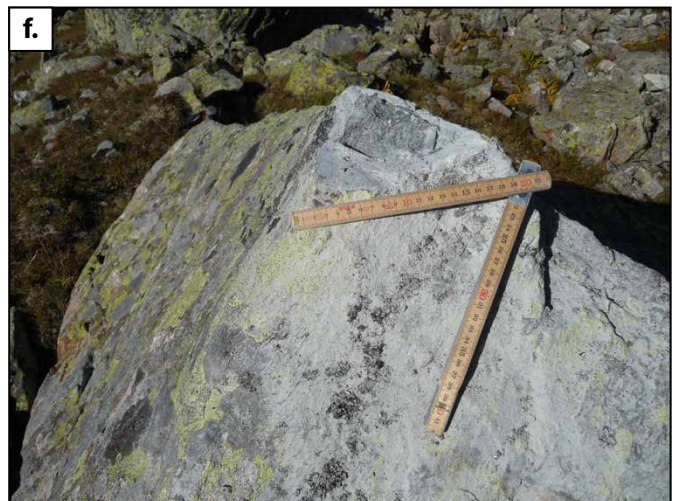

Figure S4: JAM-18-04. a. View towards SE. b. View towards S. c. View towards W. d. View towards NNW. e. View towards SE. f. Sampled rock surface.



COORDINATES N 46.8823 | E 10.1684  
ALTITUDE 2223 m  
L x B x H 4.0 x 2.2 x 2.4 m

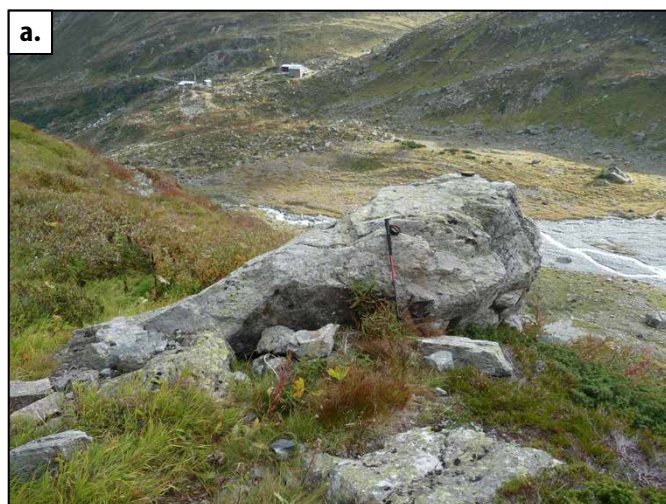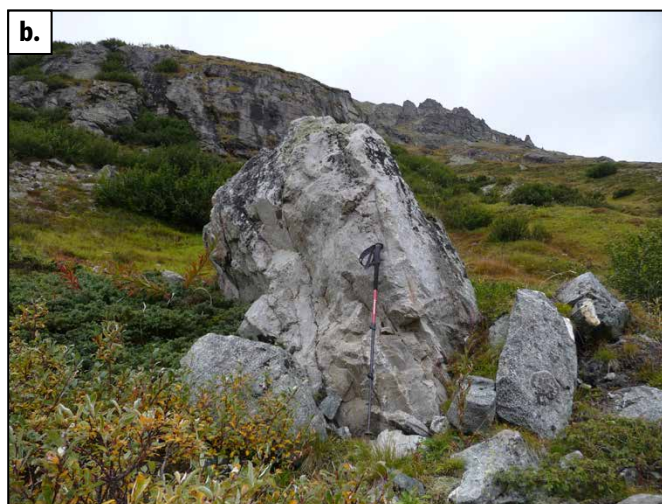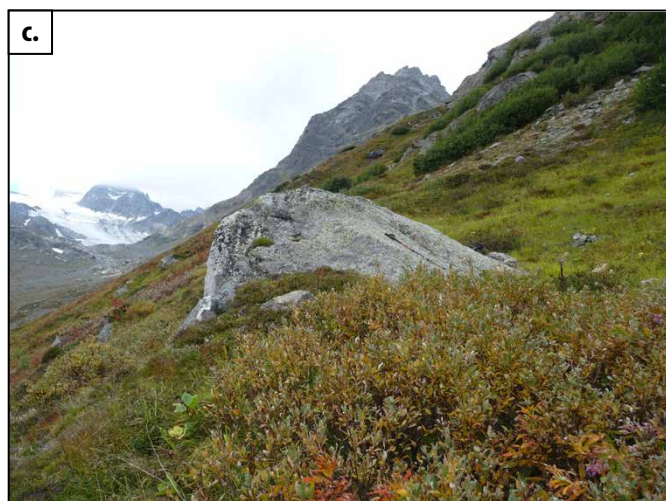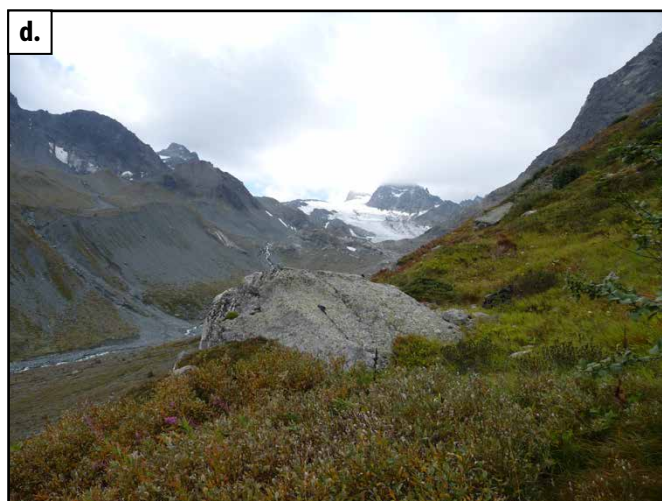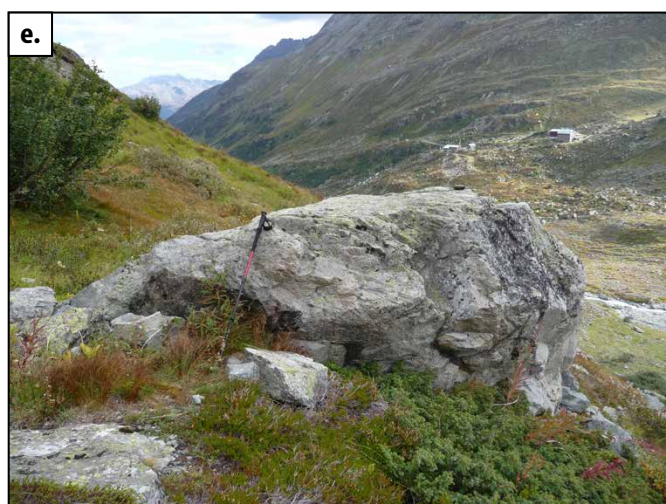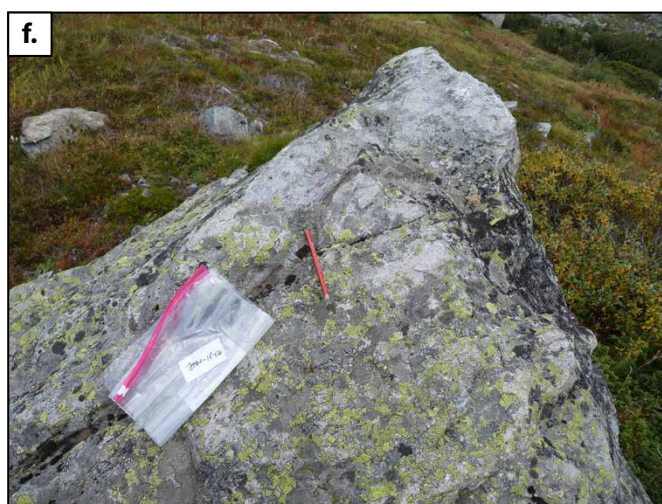

**Figure S5: JAM-18-06. a. View towards NE with Jamtalhütte in the background. b. View towards W. c. View towards S. d. View towards SE. e. View towards NE. f. Sampled rock surface.**



COORDINATES N 46.8820 | E 10.1682  
 ALTITUDE 2231 m  
 L x B x H 3.8 x 3.1 x 1.2 m

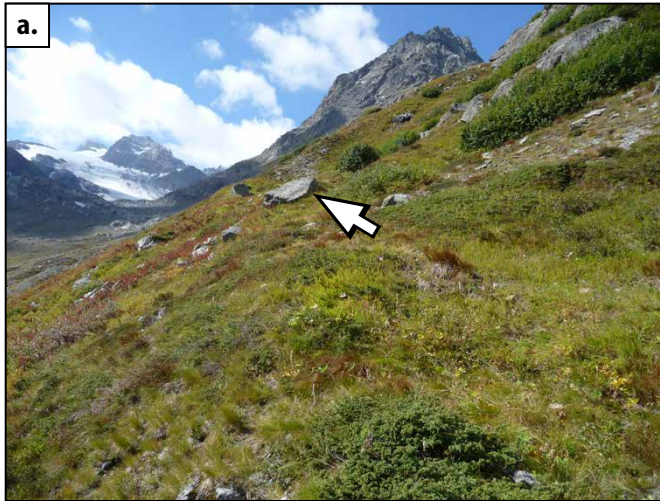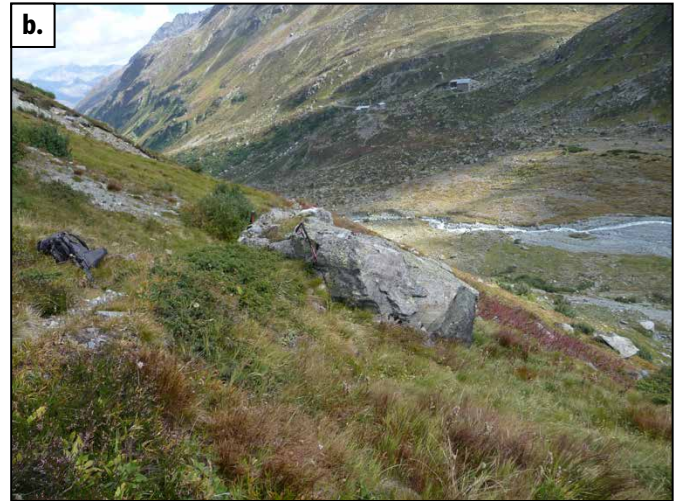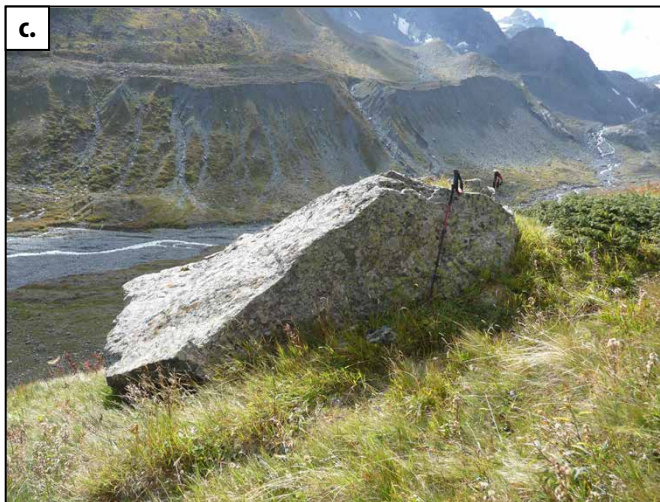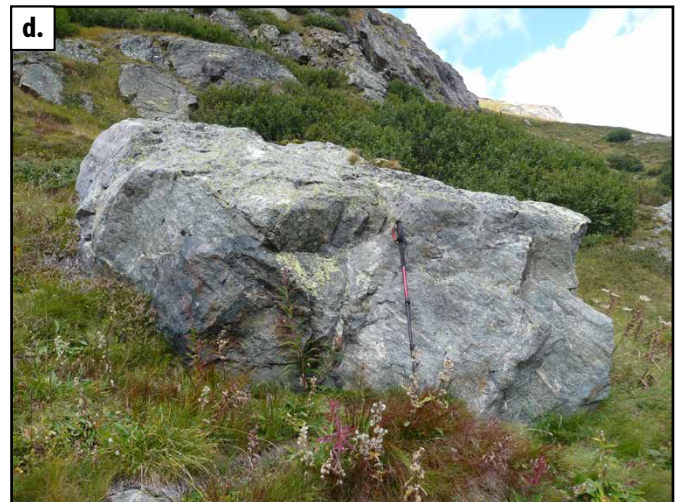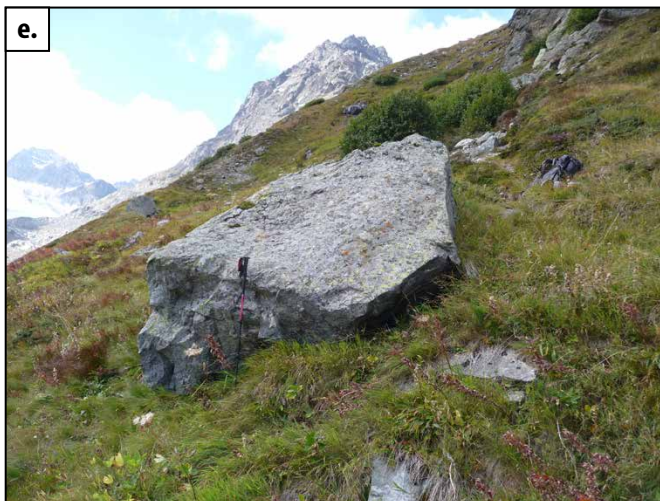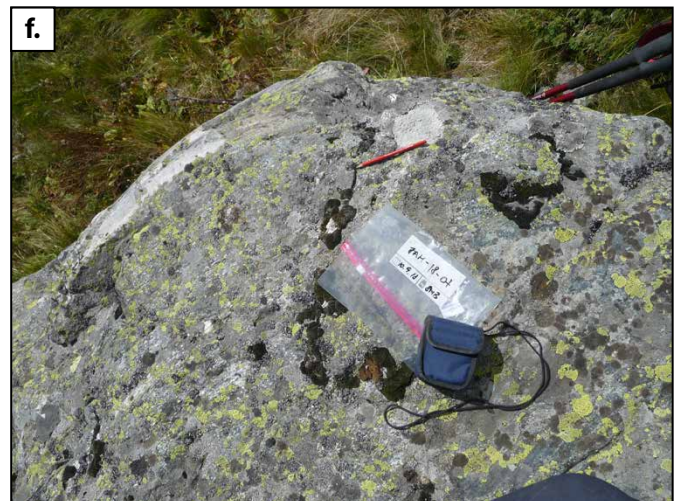

**Figure S6: JAM-18-07. a. View towards S. b. View towards NE with Jamtal hut in the background. c. View towards W with right-lateral J1 moraine in the background. d. View towards W. e. View towards SSW. f. Sampled rock surface.**



COORDINATES N 46.8766 | E 10.1718  
ALTITUDE 2316 m  
L x B x H 2.3 x 0.8 x 1.3 m

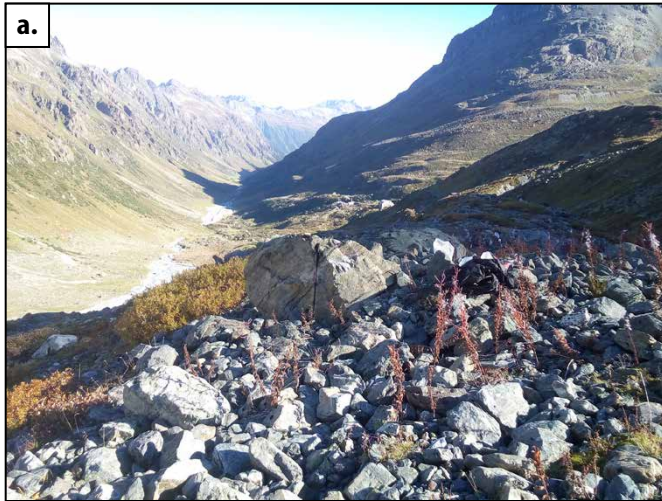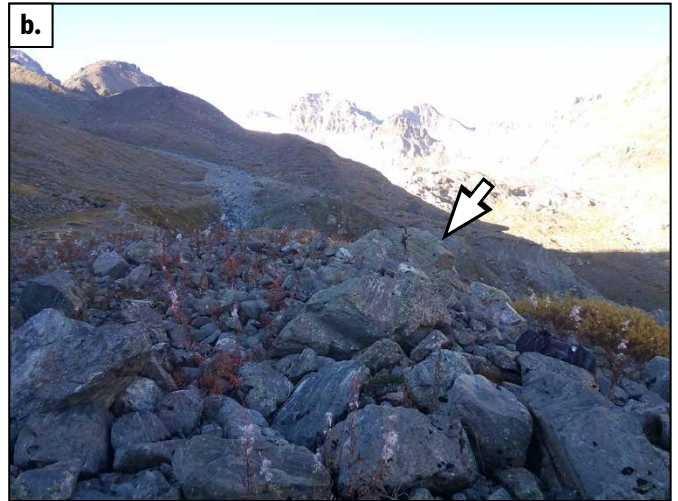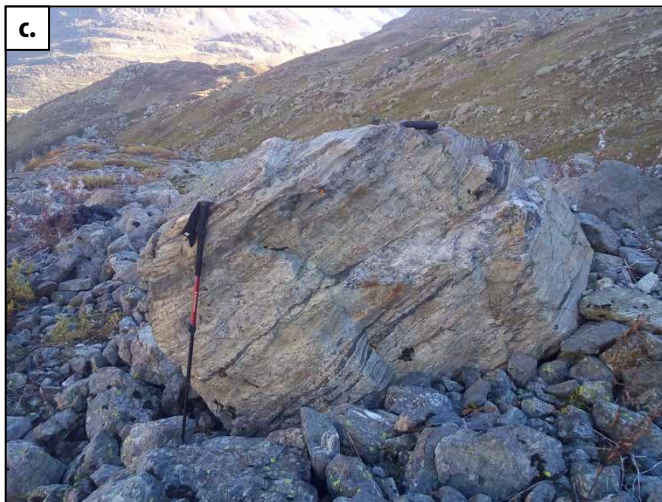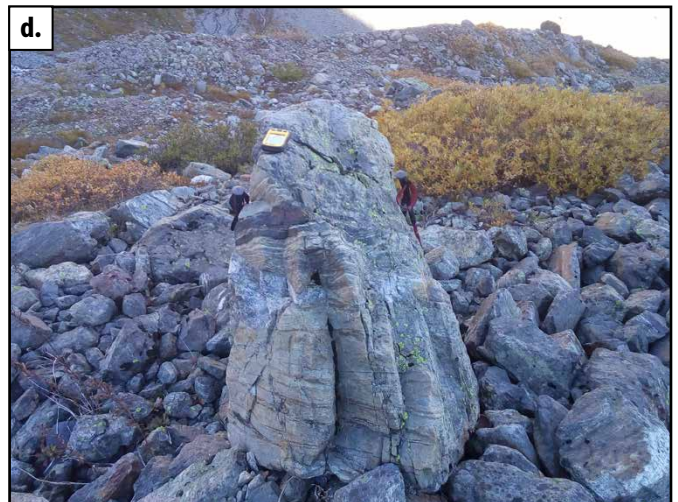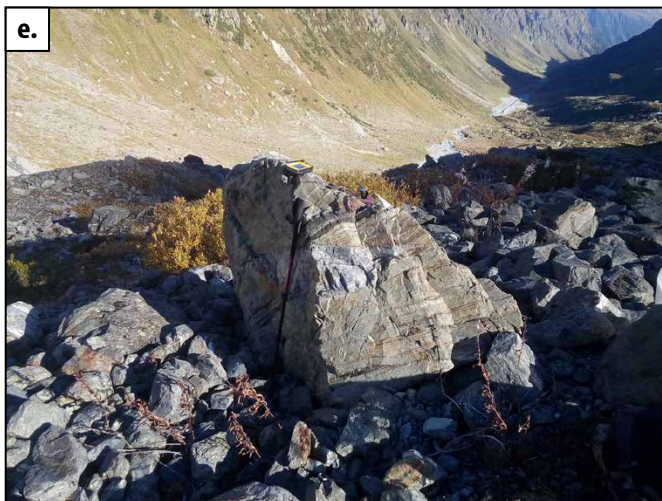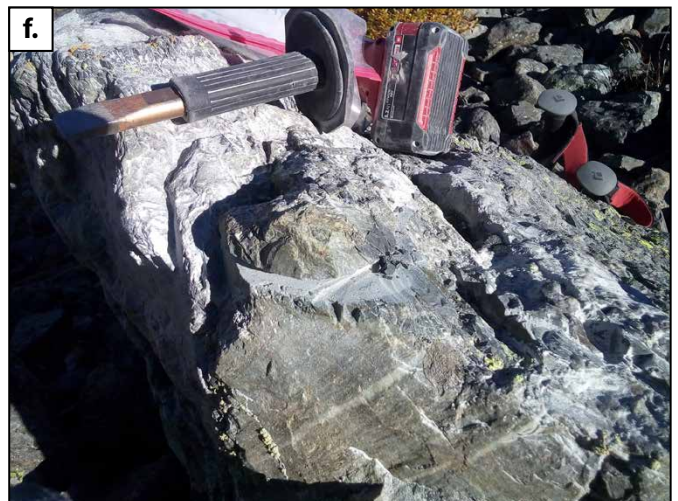

**Figure S7: JAM-18-16; age is interpreted as minimum age as the boulder might have tilted over time. a. View towards N. b. View towards S. c. View towards NNE. d. View towards E. e. View towards NW. f. Sampled rock surface.**



COORDINATES N 46.8774 | E 10.1723  
ALTITUDE 2297 m  
L x B x H 2.2 x 0.6 x 1.2 m

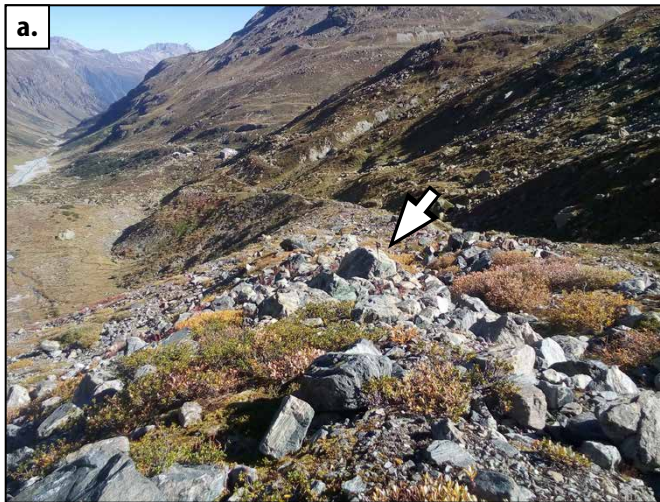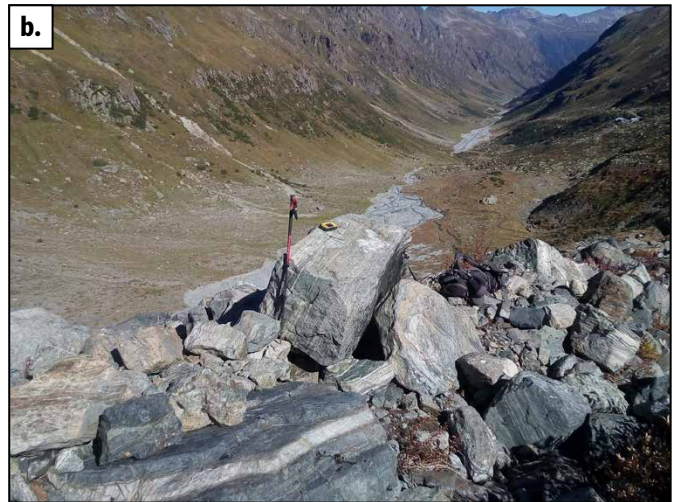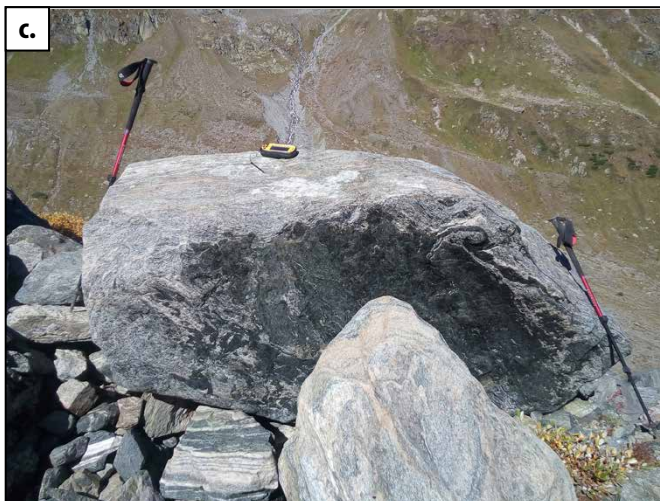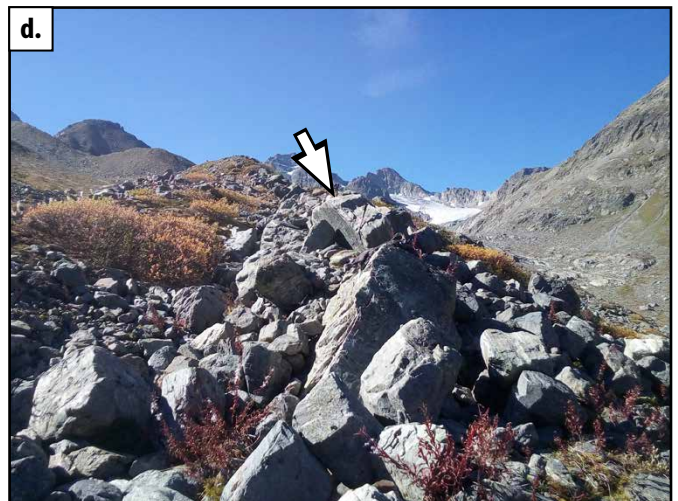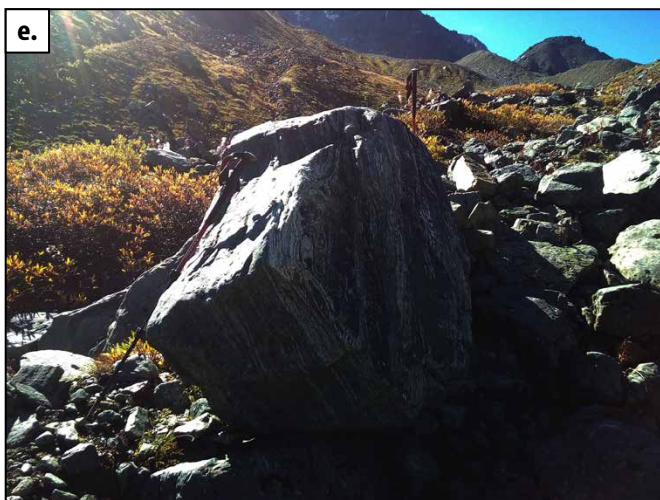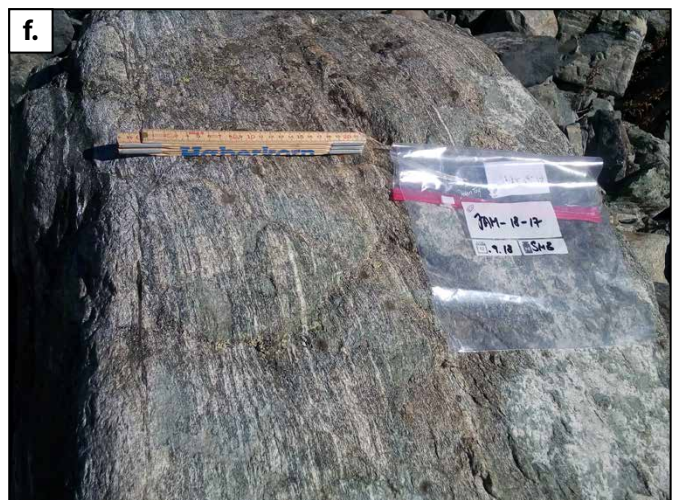

Figure S8: JAM-18-17. a. View towards N; J1 moraine. b. View towards NNW. c. View towards W. d. View towards S. e. View towards SE. f. Sampled rock surface.



COORDINATES N 46.8776 | E 10.1725  
ALTITUDE 2289 m  
L x B x H 2.1 x 2.0 x 2.3 m

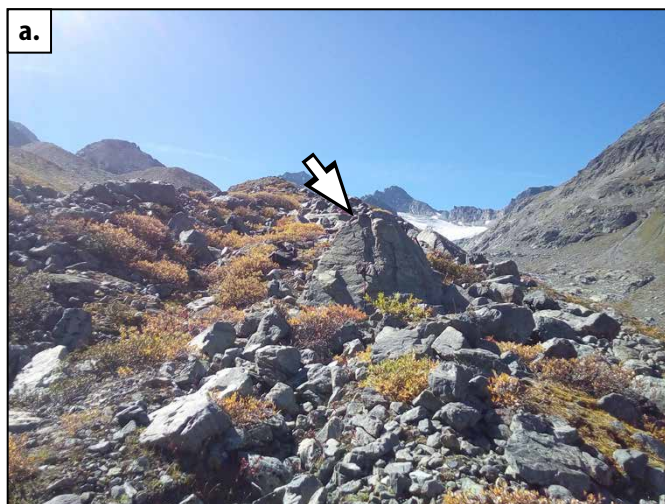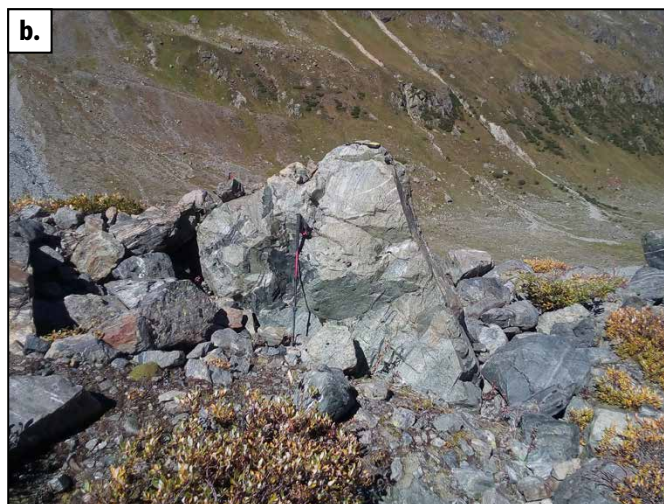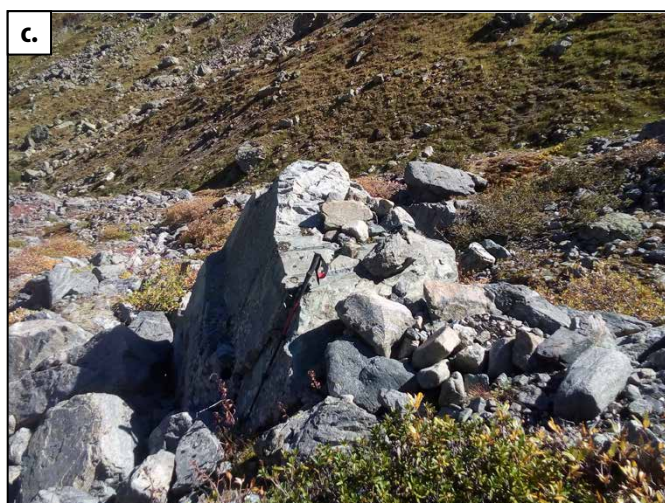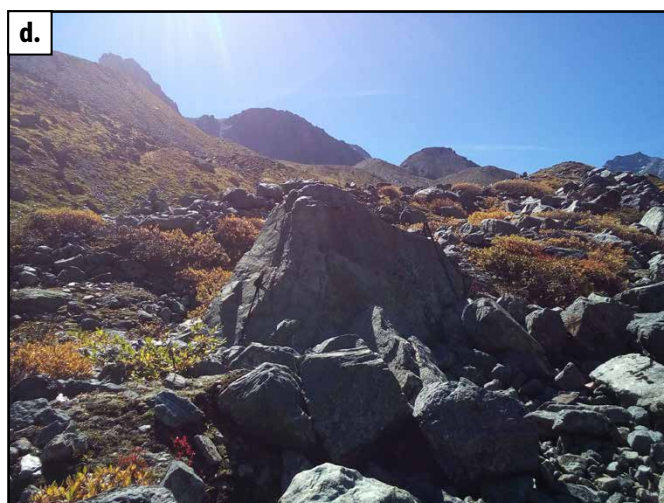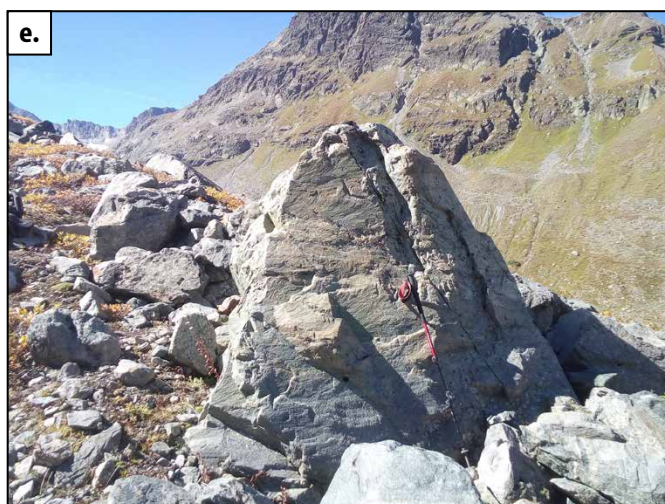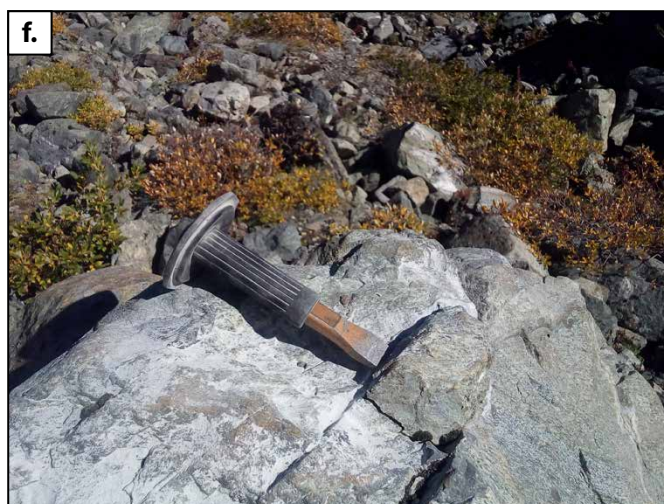

Figure S9: JAM-18-18. a. View towards S. b. View towards W. c. View towards E. d. View towards SE. e. View towards SSW. f. Sampled rock surface.



COORDINATES N 46.8776 | E 10.1738  
ALTITUDE 2318 m  
L x B x H 3.6 x 1.7 x 1.1 m

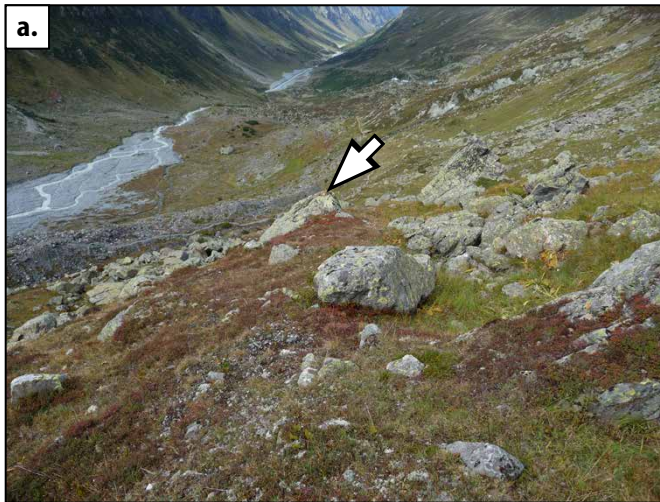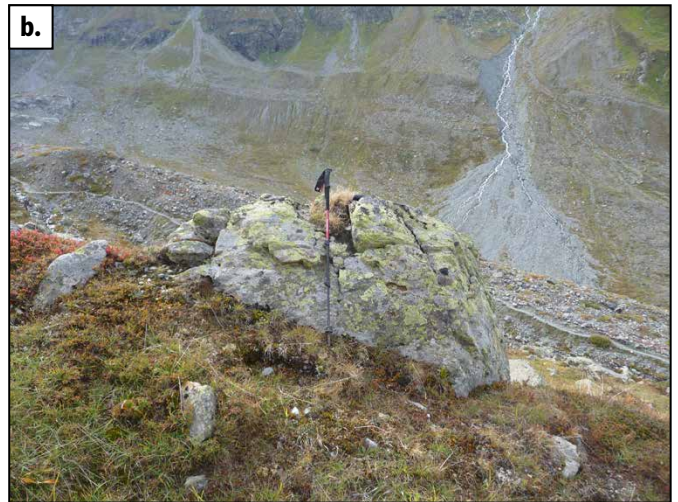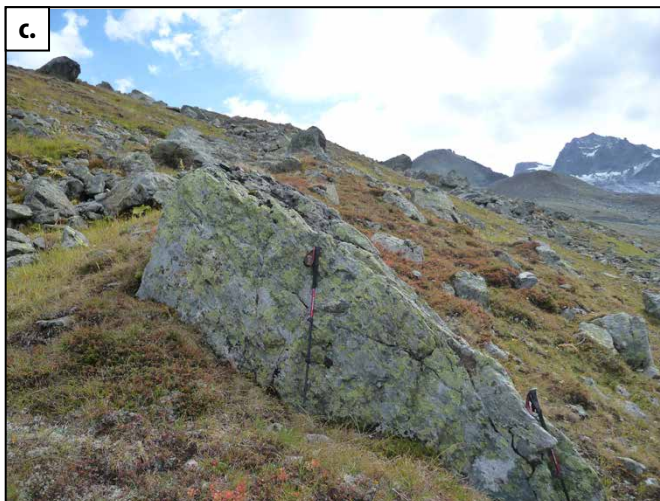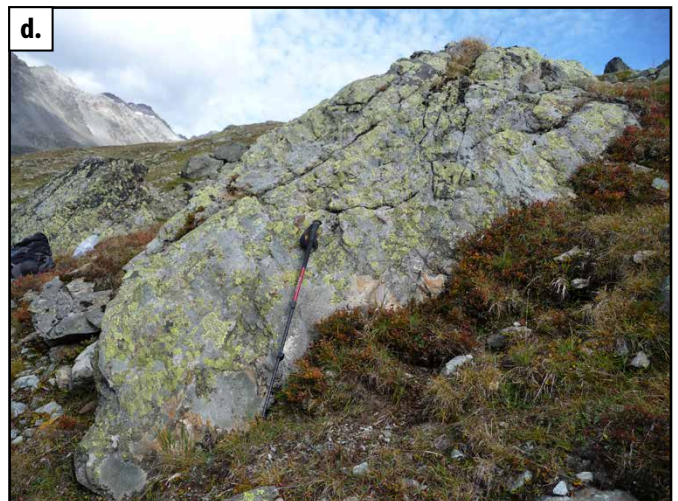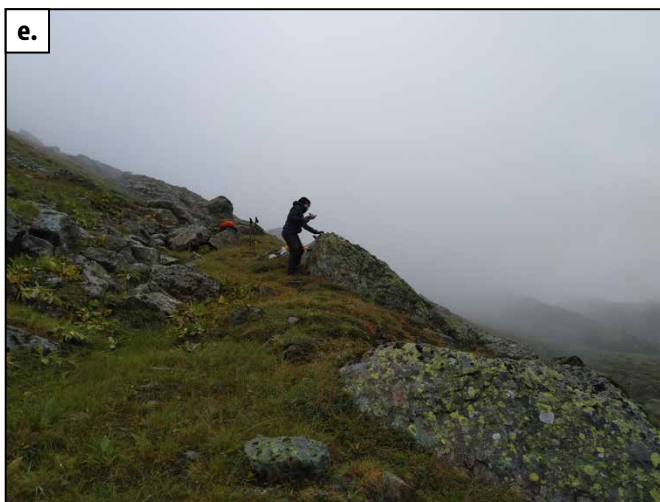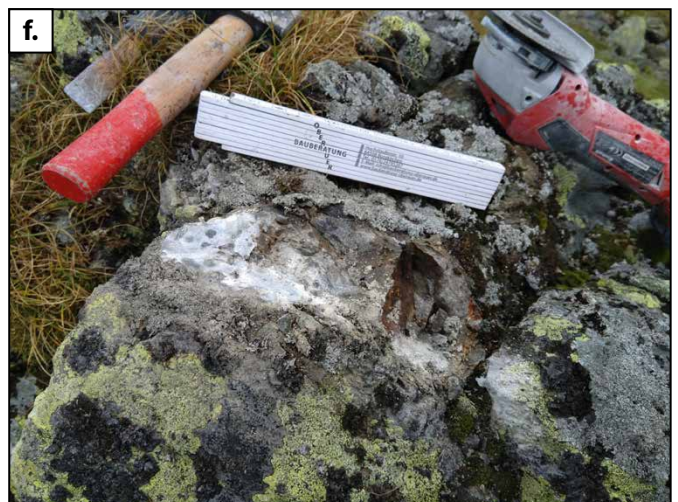

**Figure S10: JAM-19-21. a. View towards N. b. View towards W. c. View towards SE. d. View towards E. e. View towards S with a lot of fog in the background. f. Sampled rock surface.**



COORDINATES N 46.8773 | E 10.1738  
ALTITUDE 2329 m  
L x B x H 2.9 x 2.8 x 2.5 m

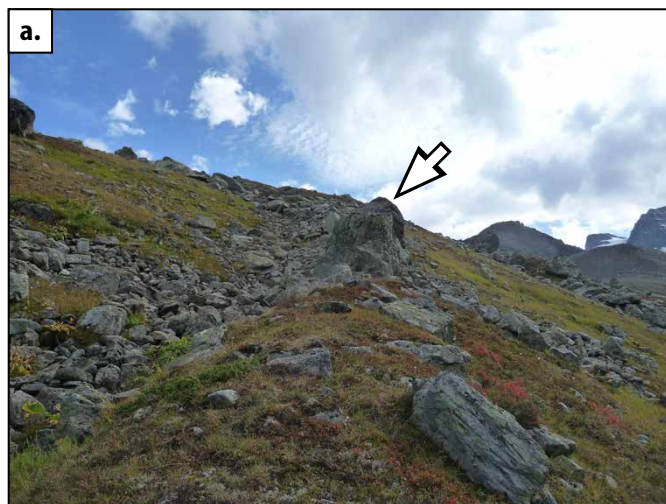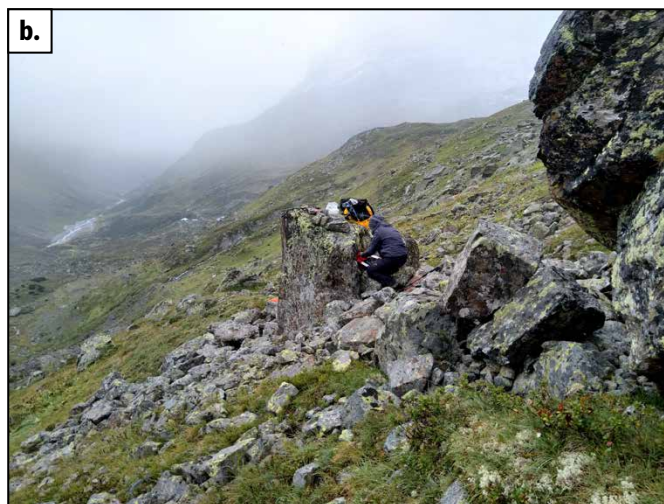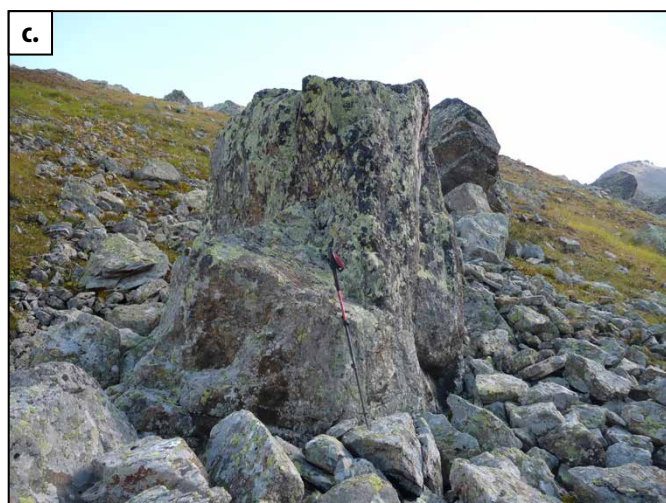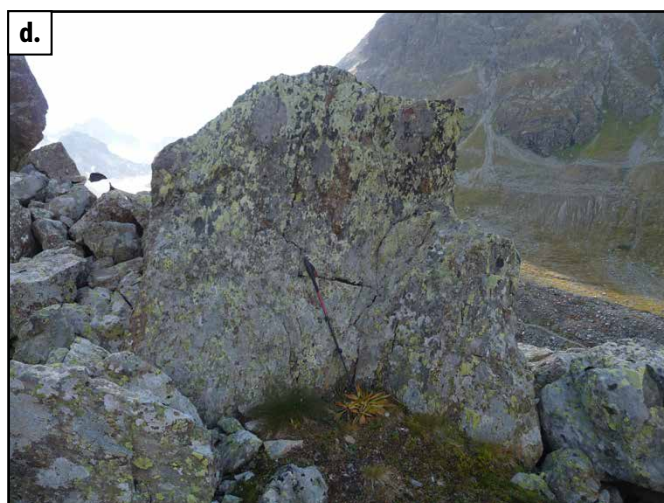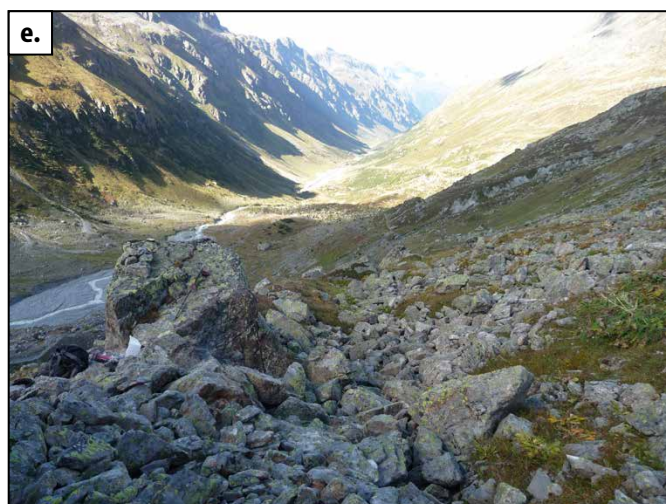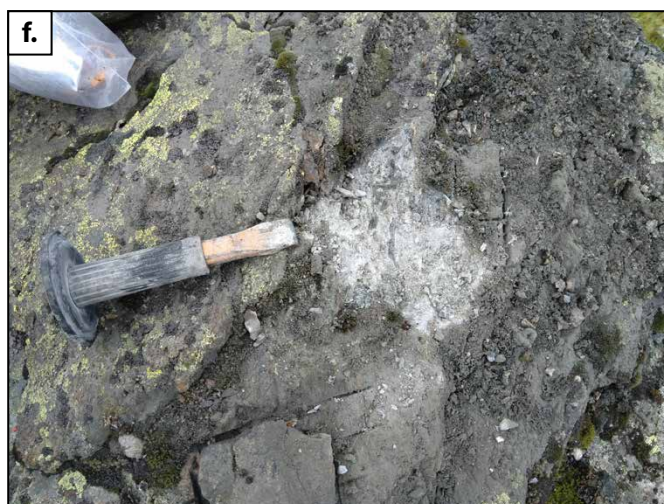

**Figure S11: JAM-19-22. a. View towards SE. b. View towards NE. c. View towards SE. d. View towards SW. e. View towards NNW. f. Sampled rock surface.**



COORDINATES N 46.9273 | E10.2220  
ALTITUDE 2162 m  
L x B x H 2.0 x 2.0 x 1.4 m<sup>3</sup>

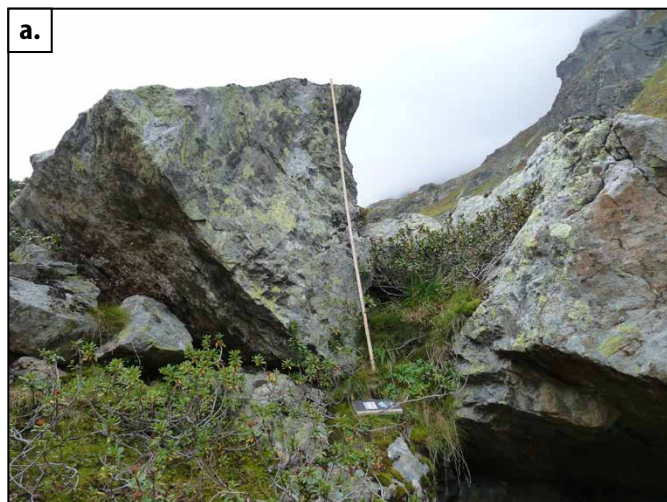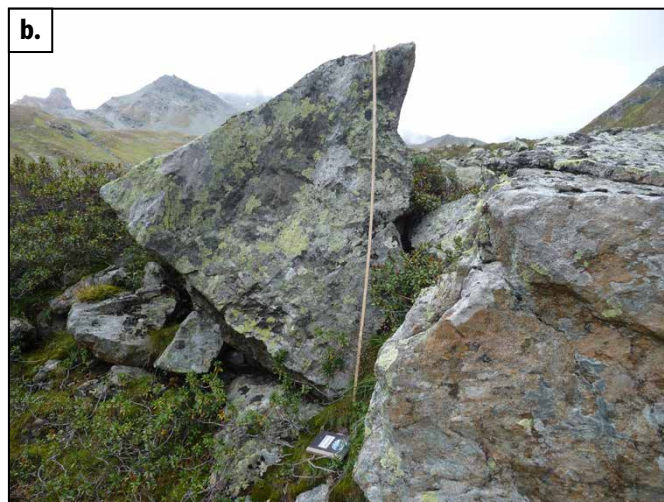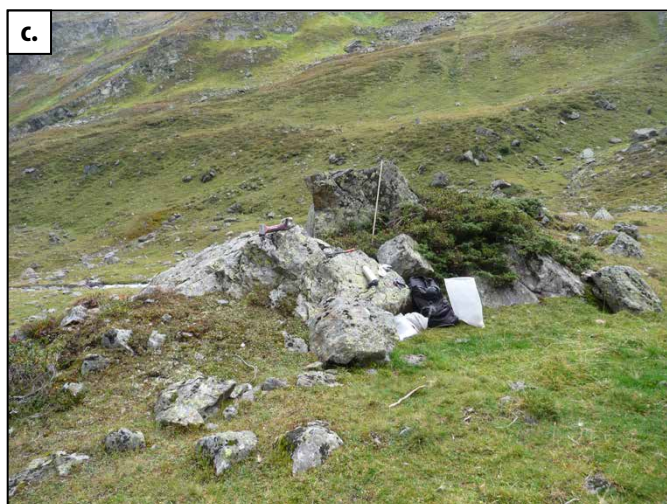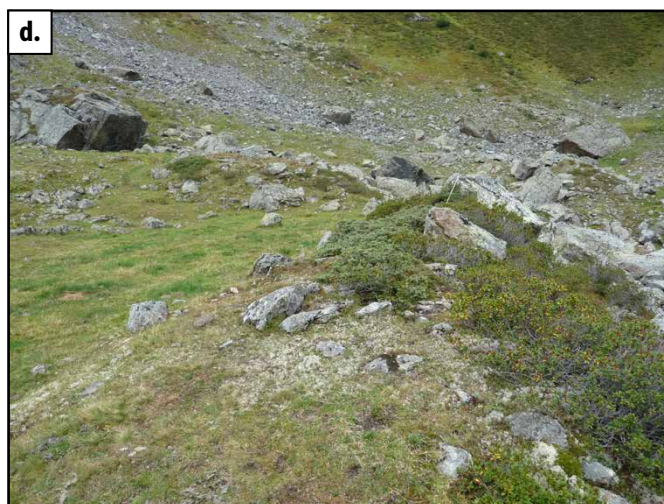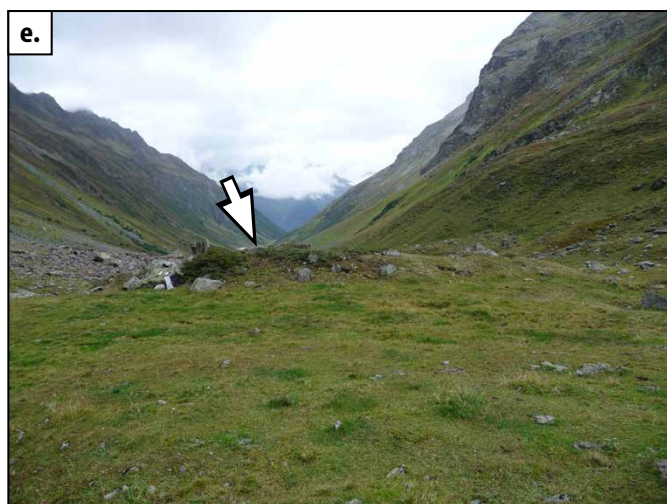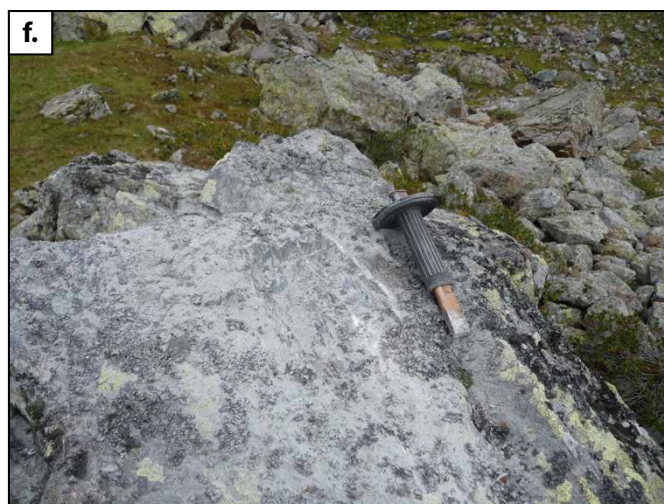

Figure S12: LAR-18-03. a. View towards N. b. View towards S from glacier-proximal side of moraine ridge. c. View towards E. d. View towards W. e. View towards N. f. Sampled rock surface.



COORDINATES N 46.9267 | E 10.2225  
ALTITUDE 2177 m  
L x B x H 2.0 x 2.0 x 1.4 m<sup>3</sup>

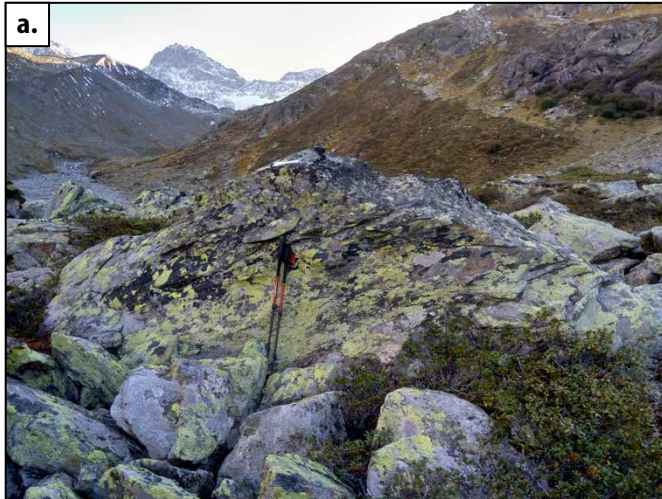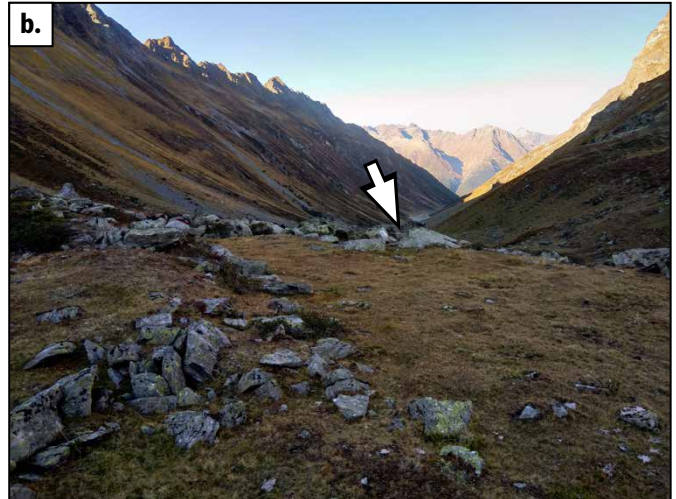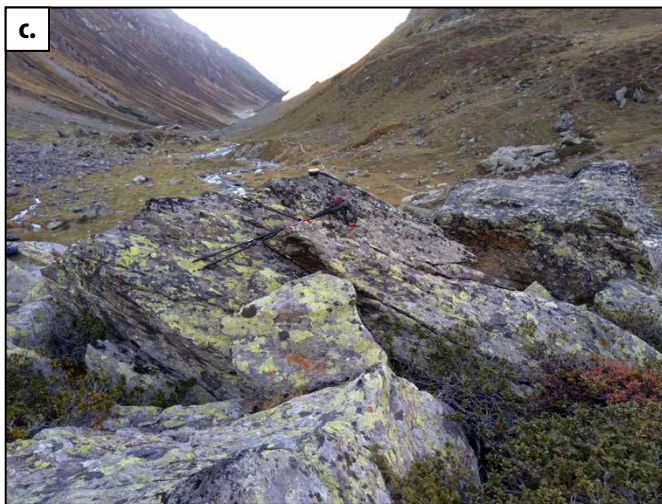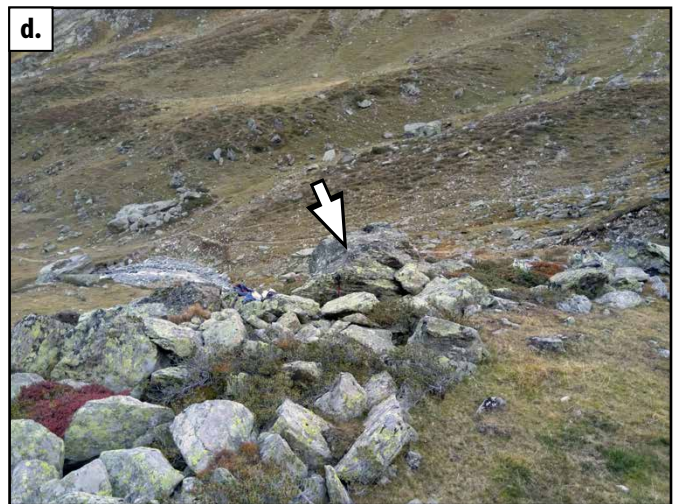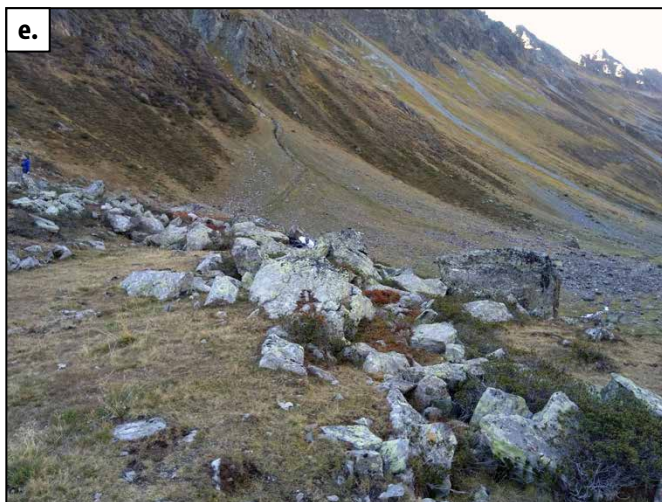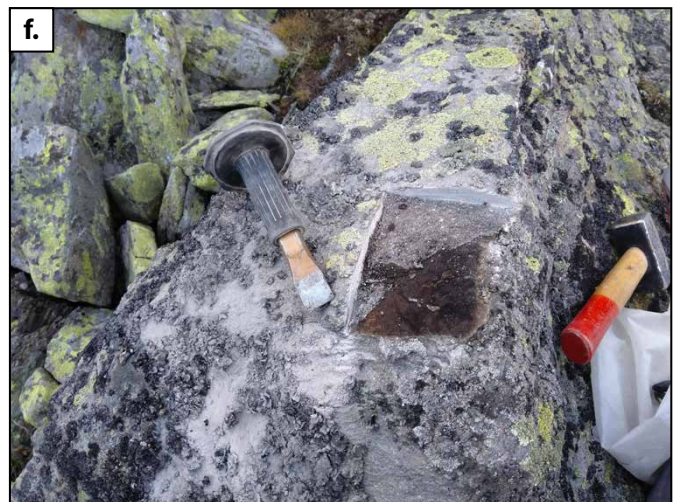

**Figure S13: LAR-18-09. a. View towards S. b. View towards N. c. View towards N with Zollhütte in the background. d. View towards E. e. View towards W. f. Sampled rock surface.**



COORDINATES N 46.9272 | E 10.2225  
ALTITUDE 2161 m a.s.l.  
L x B x H 3.6 x 1.6 x 1.0 m<sup>3</sup>

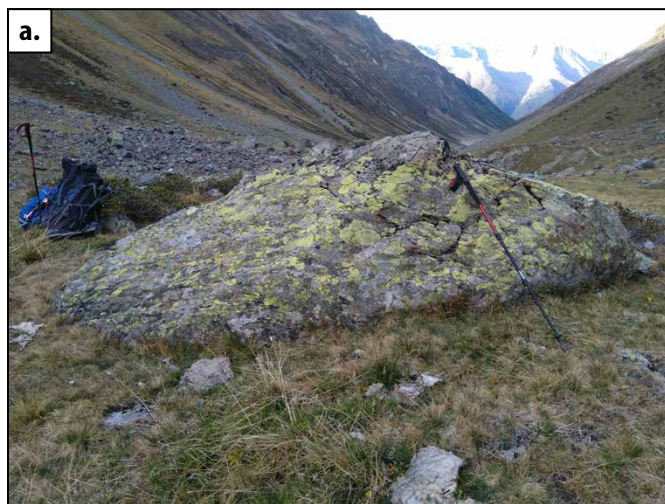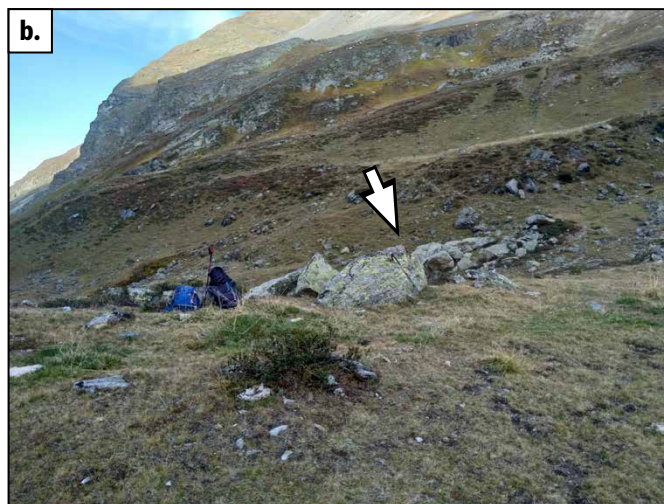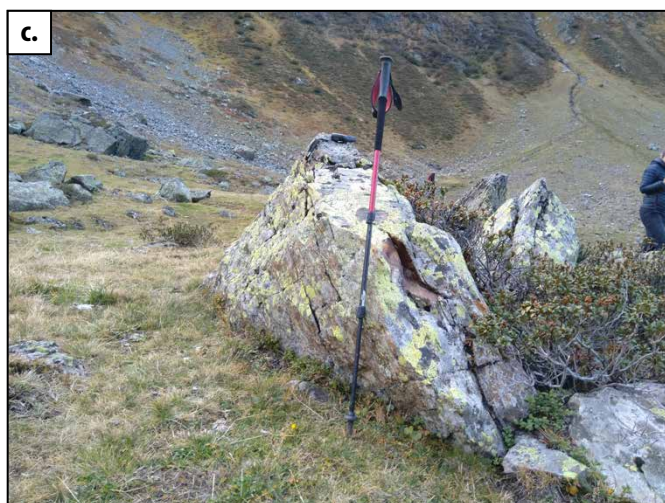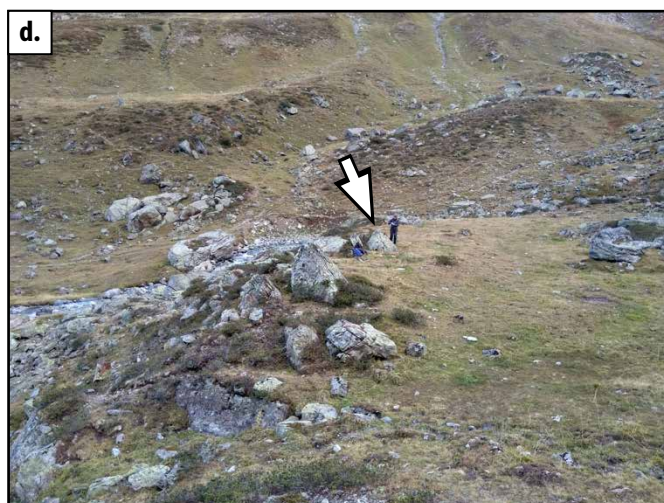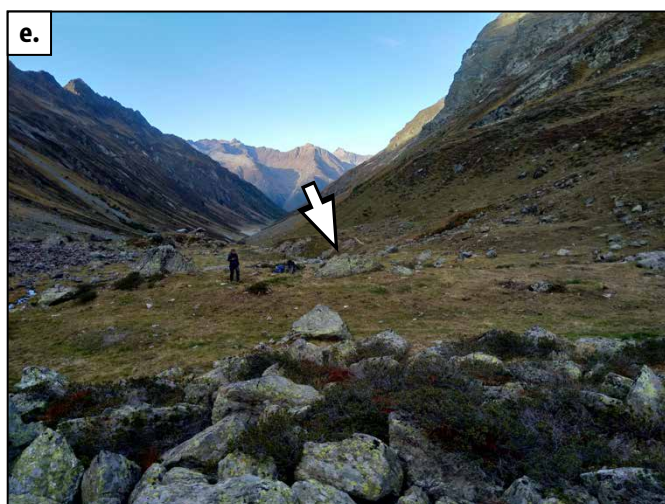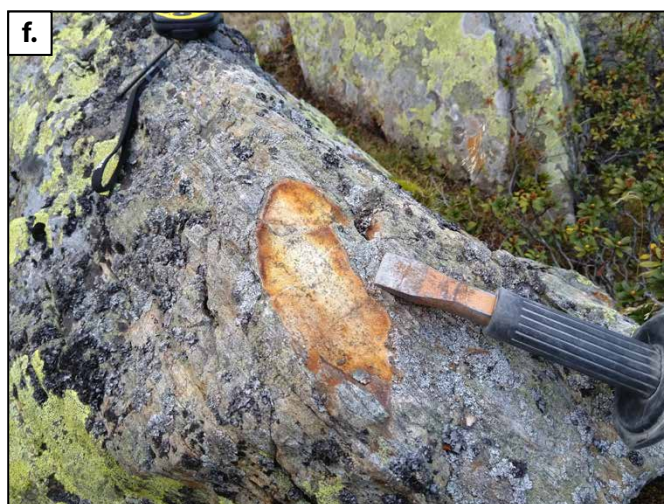

**Figure S14: LAR-18-10. a. View towards N. b. View towards E with scarp in the background. c. View towards W. d. View towards E. e. View towards N. f. Sampled rock surface.**



COORDINATES N 46.9231 | E 10.2261  
 ALTITUDE 2295 m a.s.l.  
 L x B x H 4.0 x 1.6 x 2.3 m<sup>3</sup>

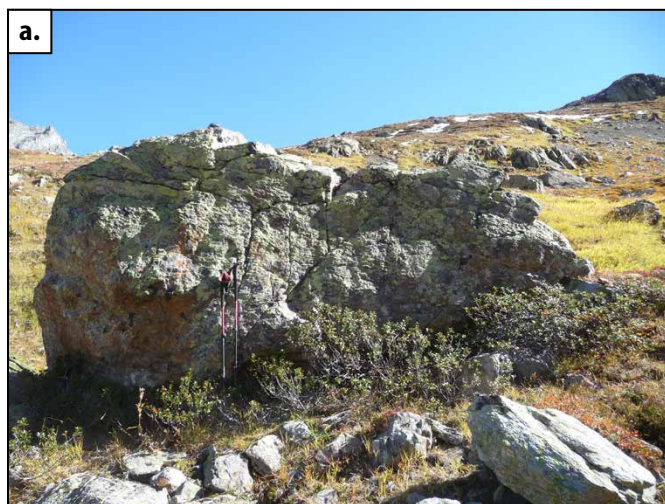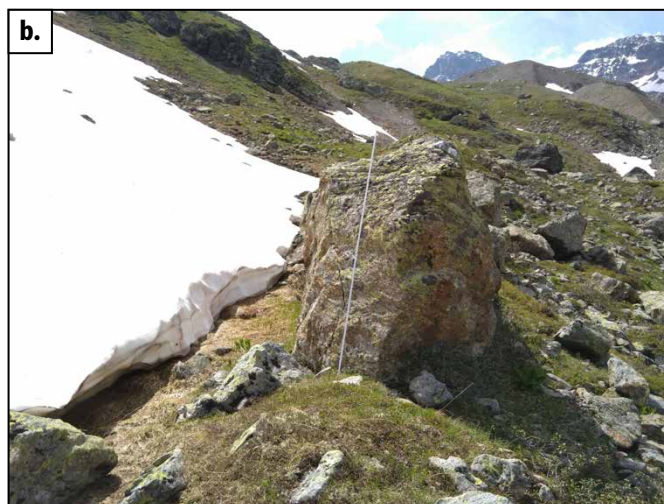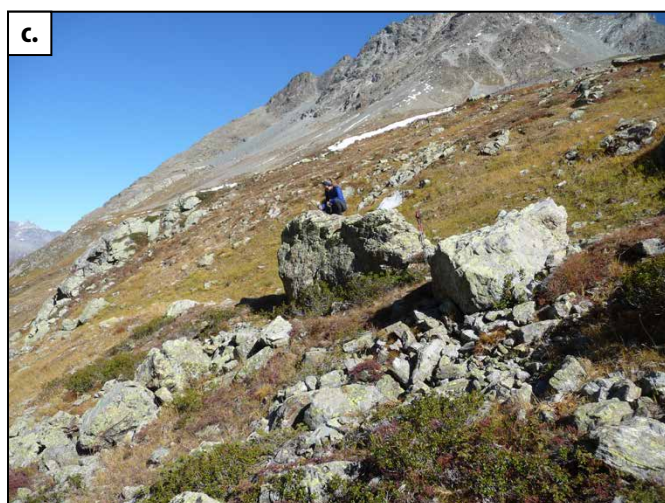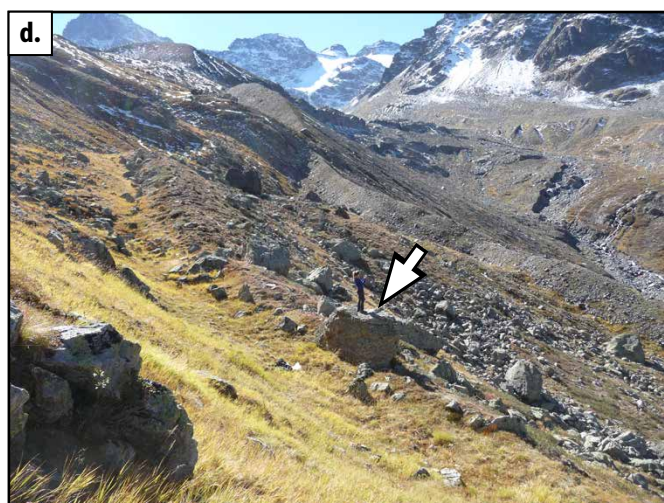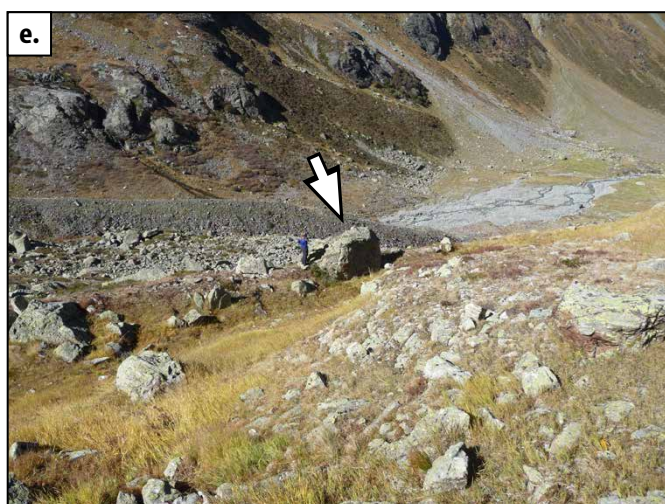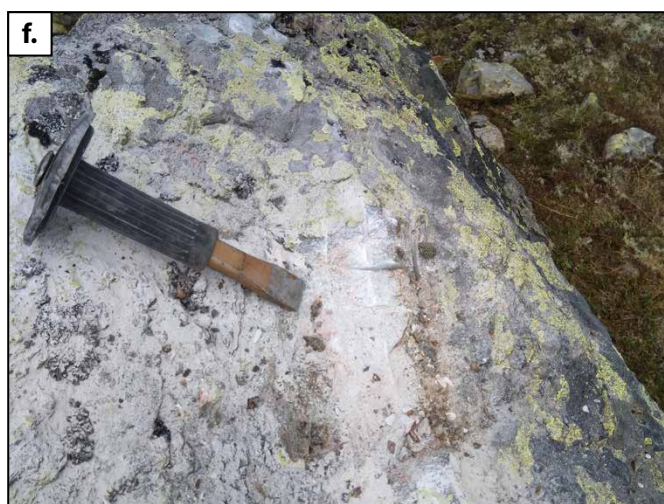

**Figure S15: LAR-19-12. a. View towards E. b. View towards SE. c. View towards NE. d. View towards S, note person standing on the boulder for scale. e. View towards W. f. Sampled rock surface.**



COORDINATES N 46.9224 | E 10.2258  
ALTITUDE 2303 m  
L x B x H 2.0 x 2.5 x 2.5 m<sup>3</sup>

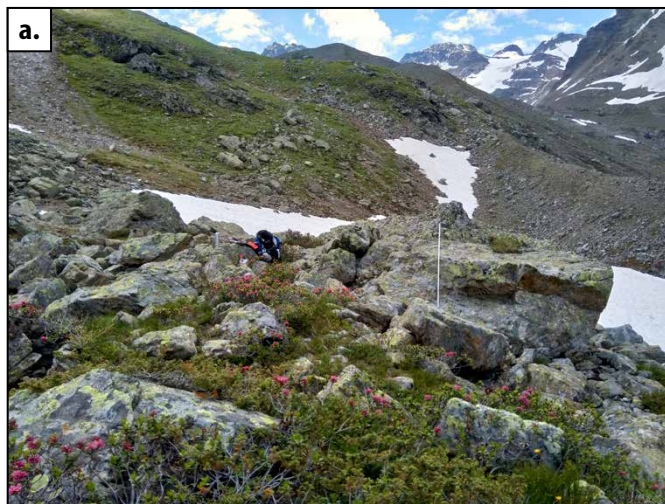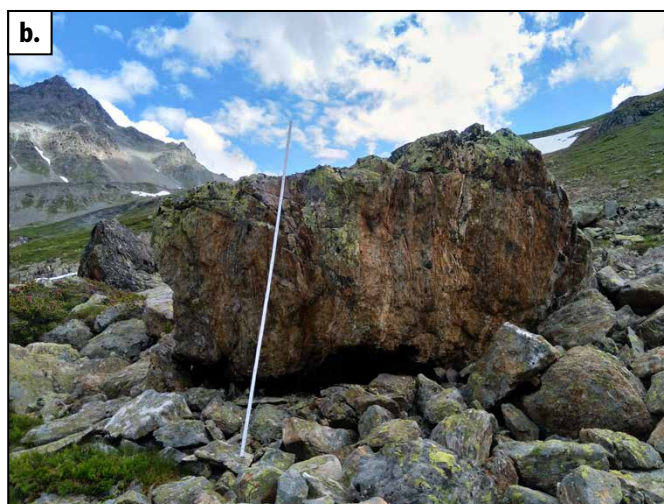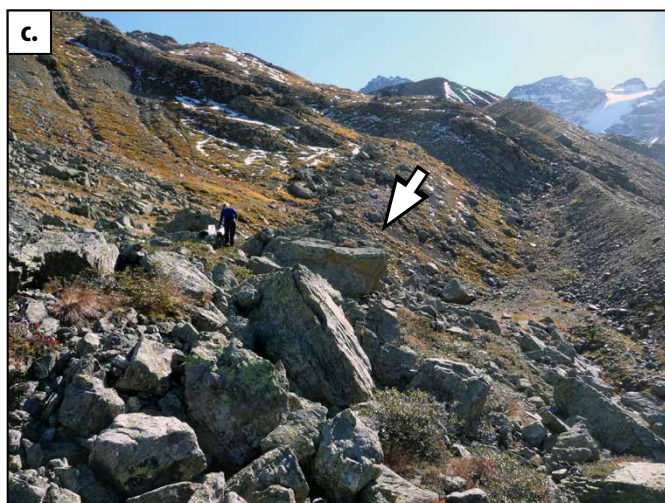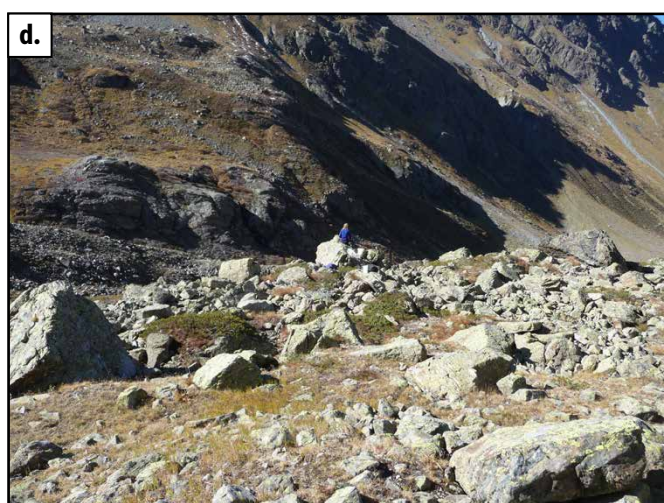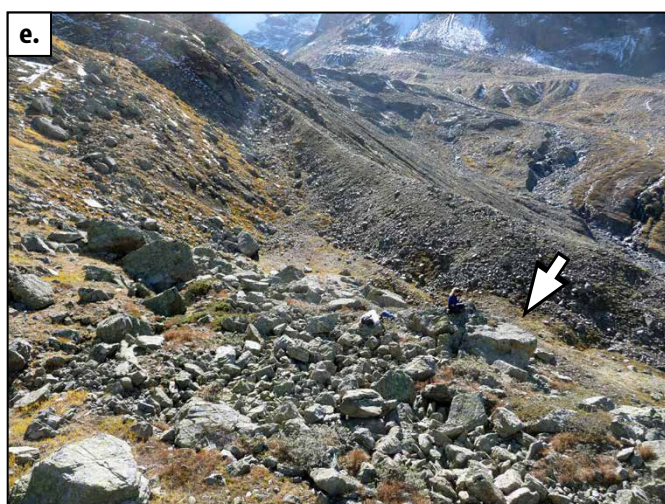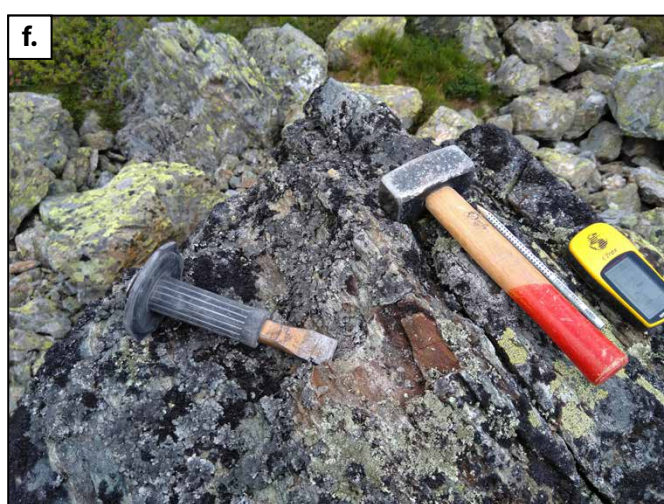

**Figure S16: LAR-19-13. a. View towards N. b. View towards NE from glacier-proximal side of moraine ridge. c. View towards S. d. View towards W. e. View towards SE. f. Sampled rock surface.**



COORDINATES N 46.9225 | E 10.2258  
ALTITUDE 2303 m  
L x B x H 3.7 x 3.1 x 2.8 m<sup>3</sup>

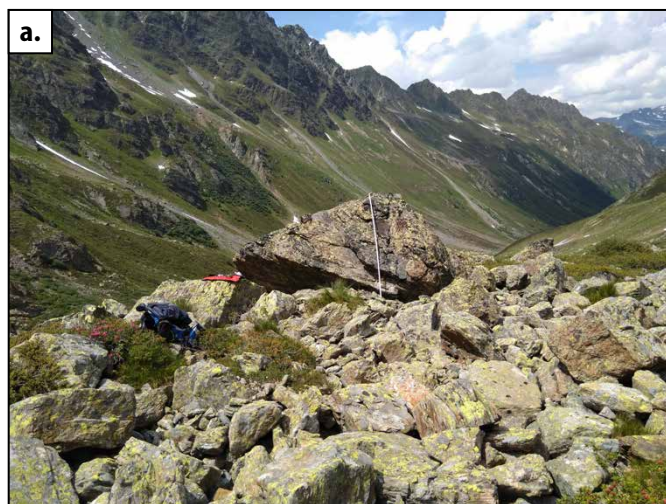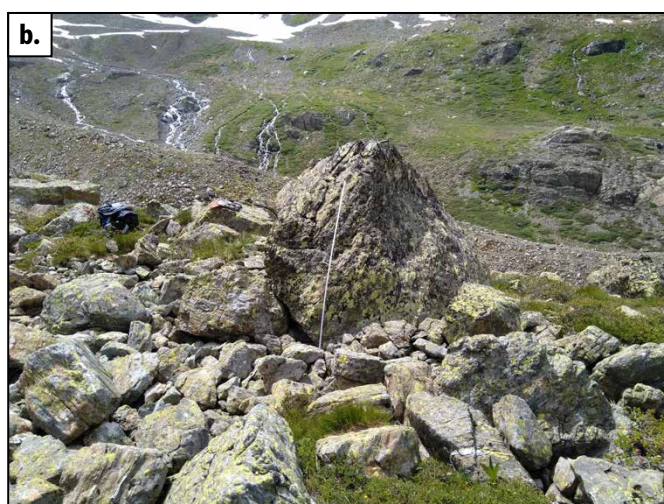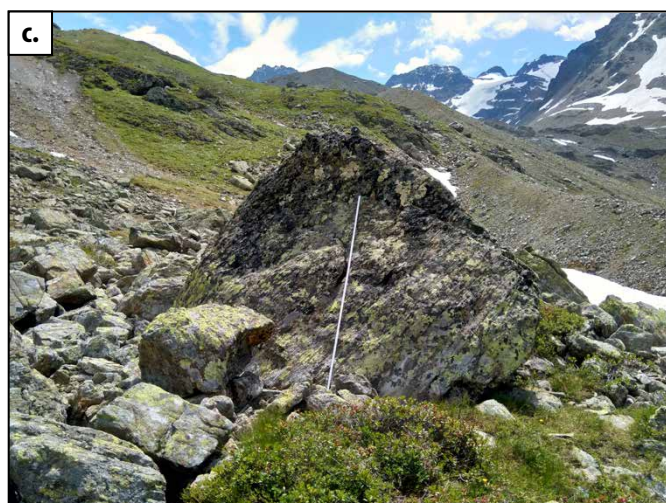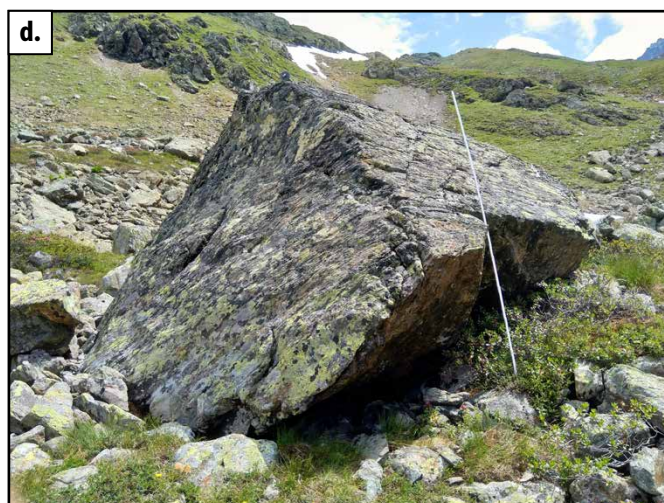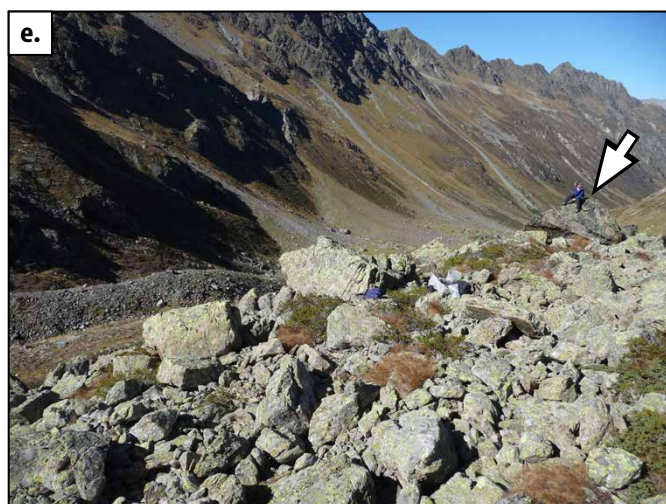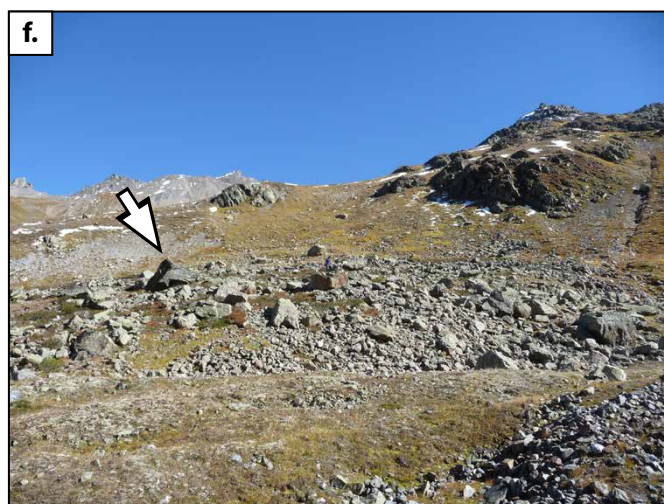

Figure S17: LAR-19-14. a. View towards NE. b. View towards W. c. View towards S. d. View towards SE e. View towards NW. f. View towards E.



COORDINATES N 46.9240 | E 10.2259  
ALTITUDE 2275 m  
L x B x H 3.6 x 2.1 x 2.4 m<sup>3</sup>

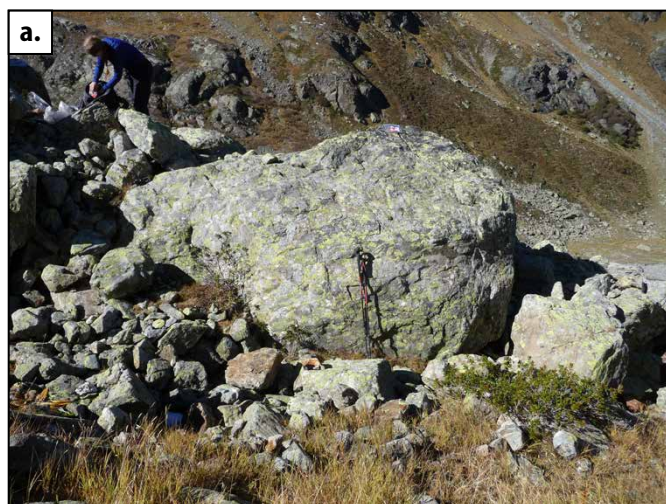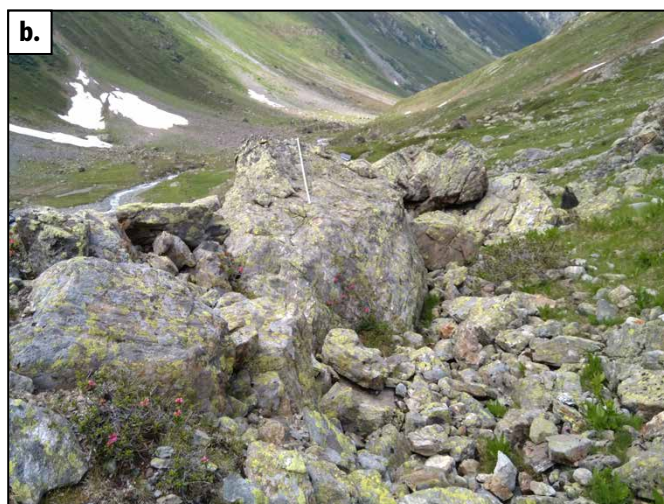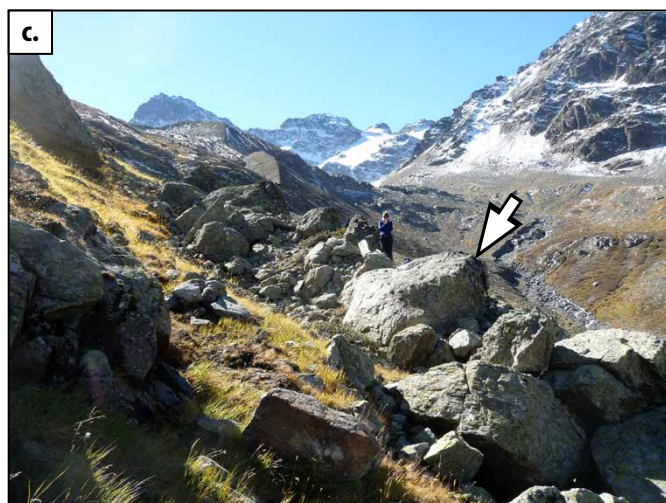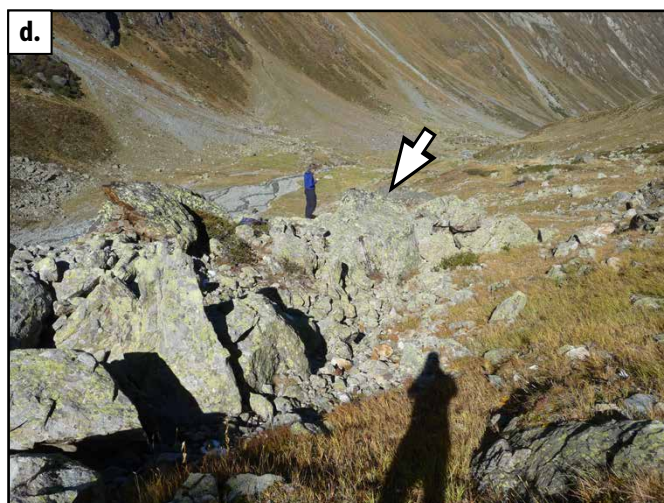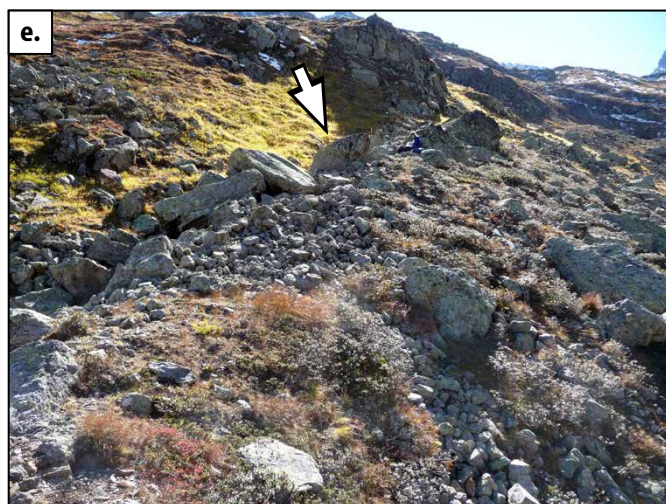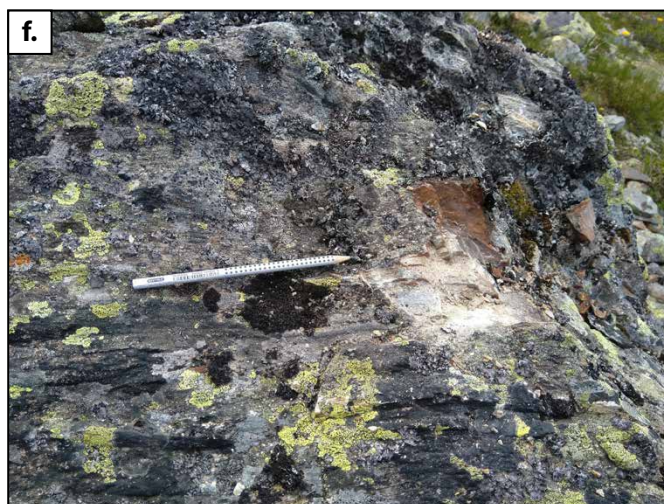

**Figure S18: LAR-19-15. a. View towards NW with left-lateral L3 in the background. b. View towards N. c. View towards S. d. View towards NW. e. View towards SE. f. Sampled rock surface.**



COORDINATES N 46.9238 | E 10.2260  
ALTITUDE 2280 m  
L x B x H 2.2 x 2.0 x 2.2 m<sup>3</sup>

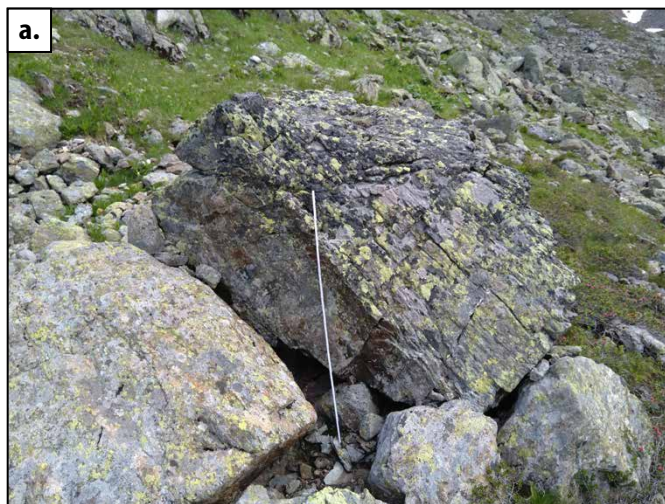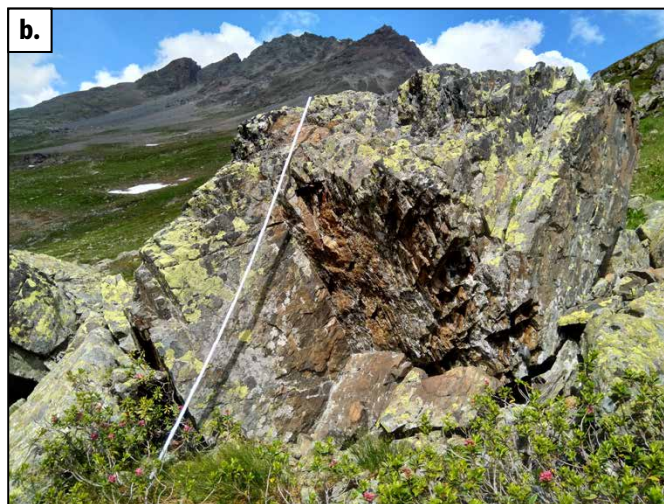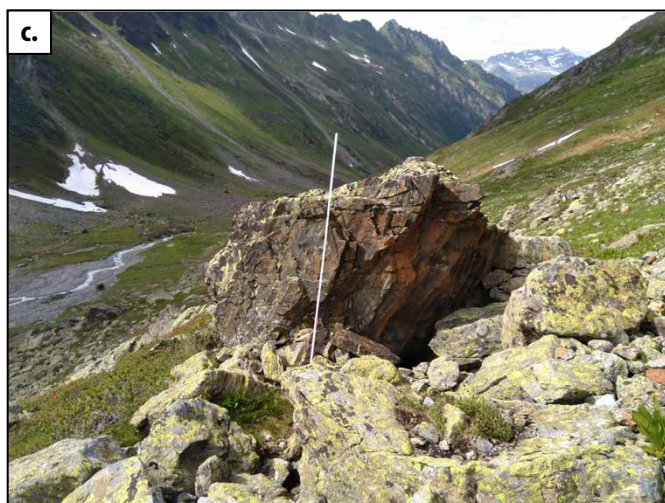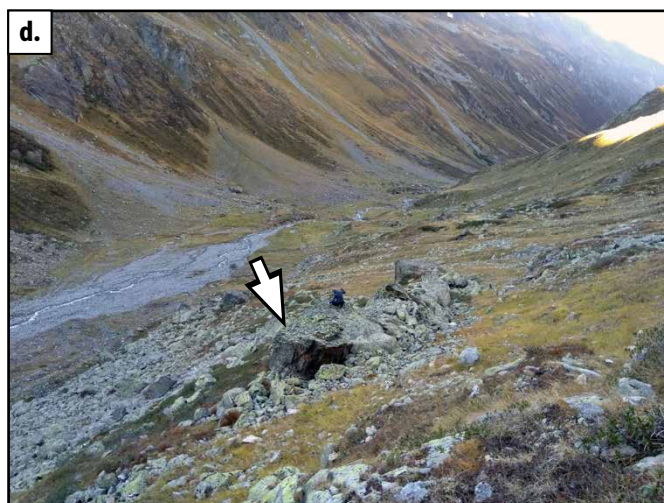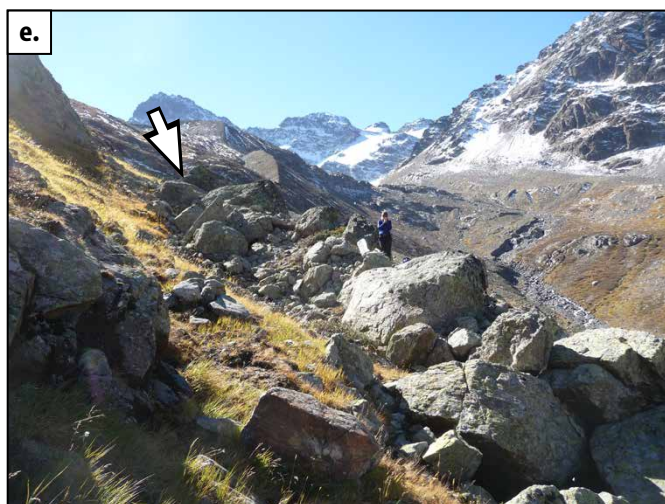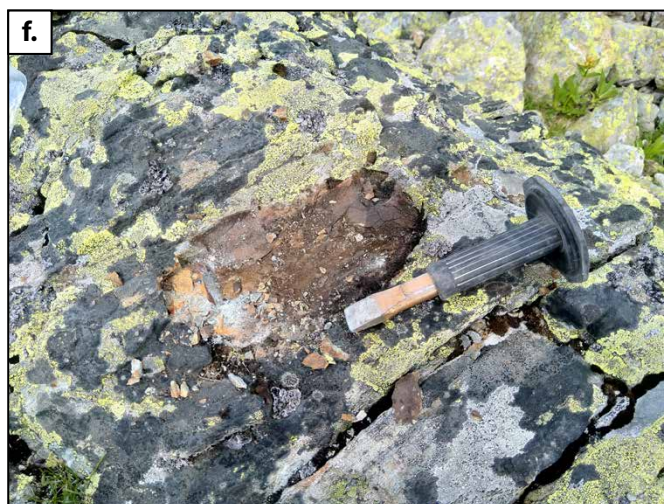

**Figure S19: LAR-19-16. a. View towards S. b. View towards NE with Hoher Kogel peak in the background. c. View towards NE. d. View towards NE. e. View towards S. f. Sampled rock surface.**



COORDINATES N 46.9267 | E 10.2223  
 ALTITUDE 2179 m  
 L x B x H 3.1 x 2.1 x 0.8 m<sup>3</sup>

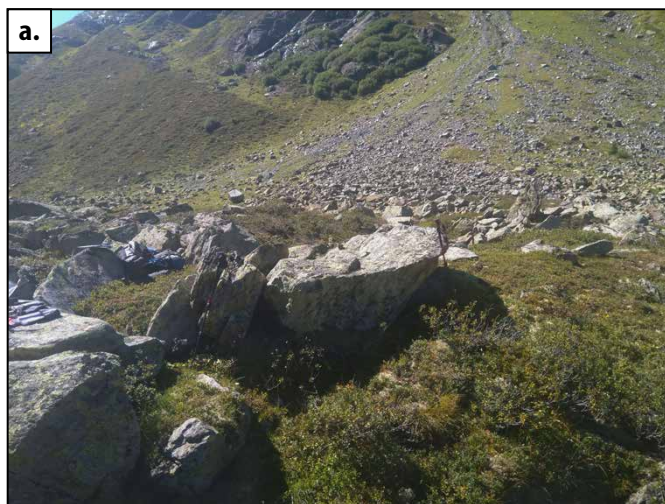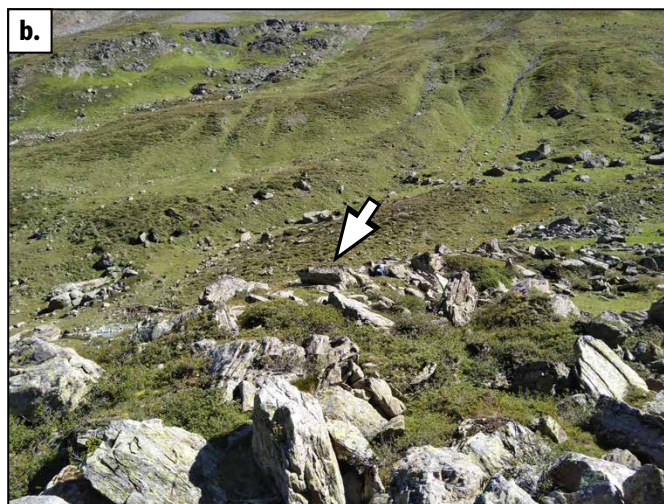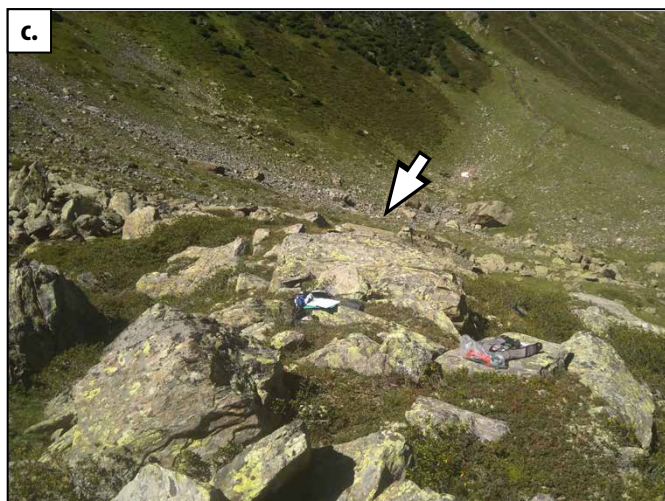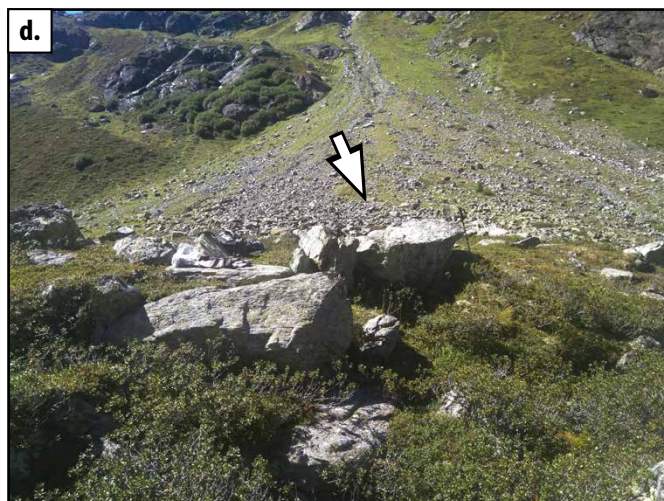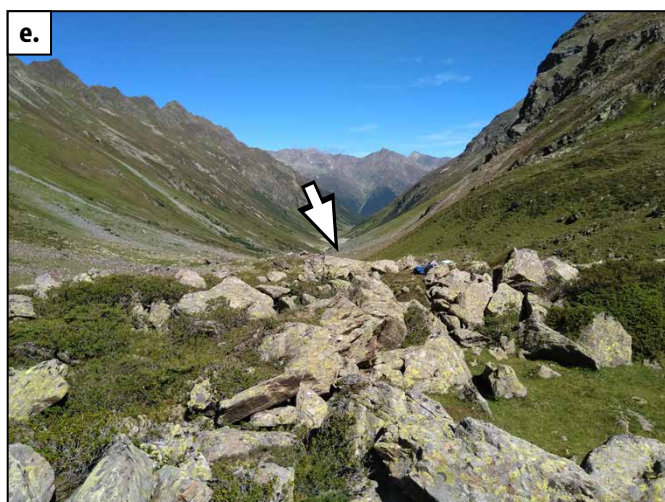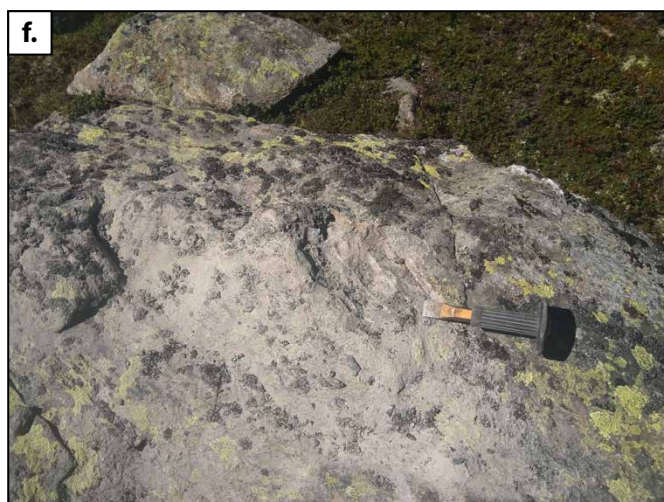

**Figure S20: LAR-19-17. a. View towards W with left-lateral L3 cut by a debris cone in the background. b. View towards E. c. View towards NW. d. View towards W. e. View towards S. f. Sampled rock surface.**



COORDINATES N 46.9268 | E 10.2223  
ALTITUDE 2178 m  
L x B x H 3.0 x 2.3 x 1.7 m<sup>3</sup>

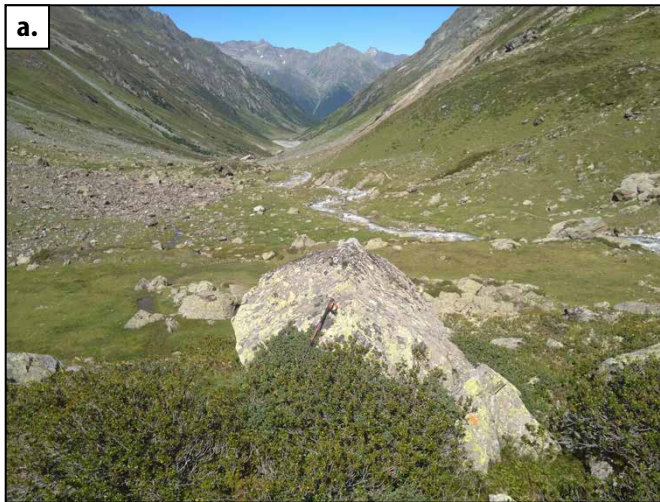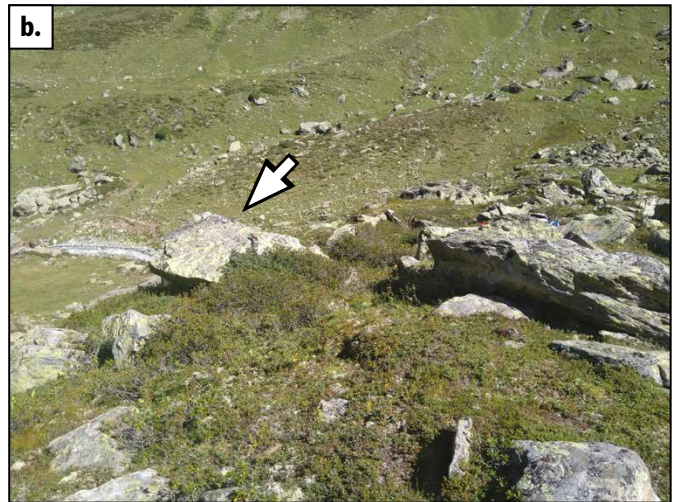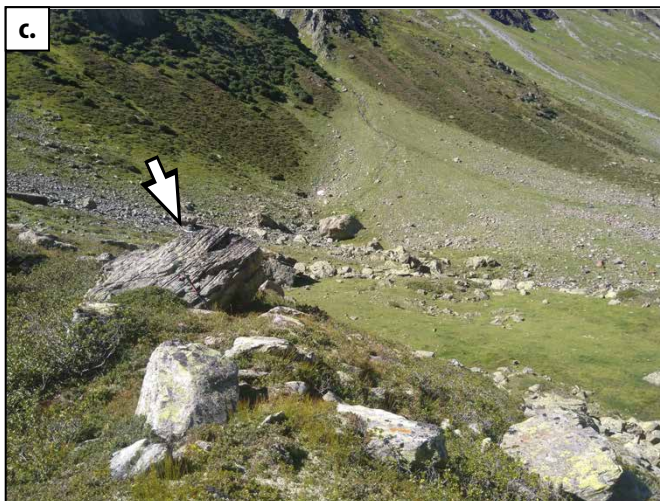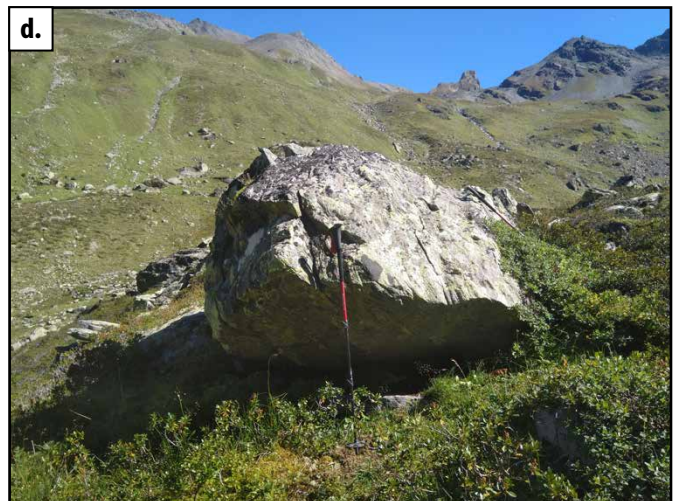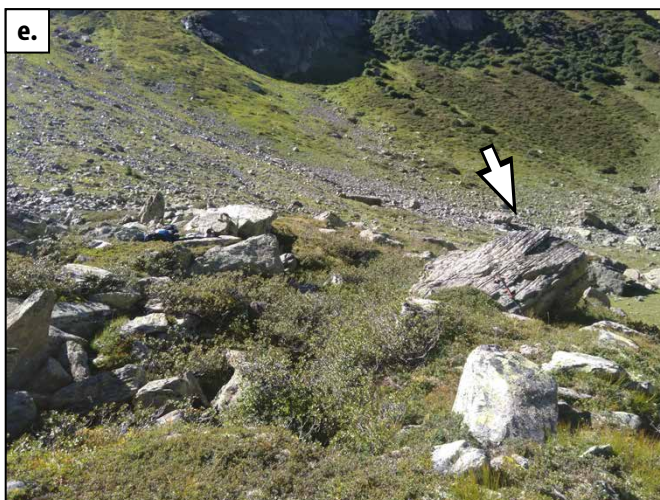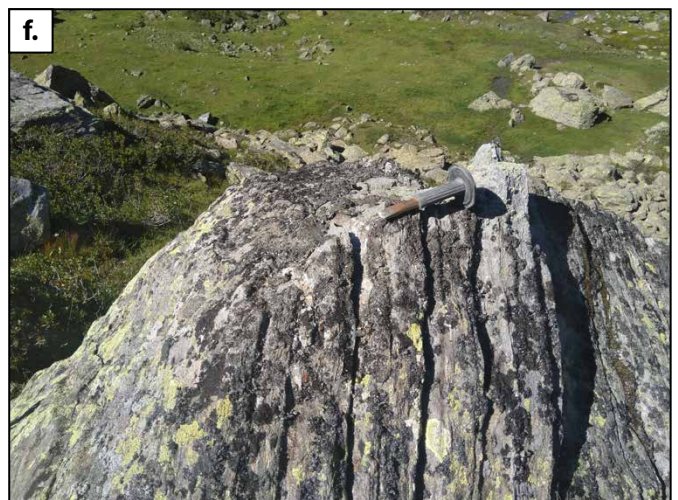

**Figure S21: LAR-19-18. a. View towards N with Zollhütte and L5 in the background. b. View towards E. c. View towards NW. d. View towards E with Ritzenjoch in the background. e. View towards W with LAR-18-17 in background (backpack). f. Sampled rock surface.**



COORDINATES N 46.9267 | E 10.2226  
ALTITUDE 2178 m  
L x B x H 2.1 x 1.7 x 1.1 m<sup>3</sup>

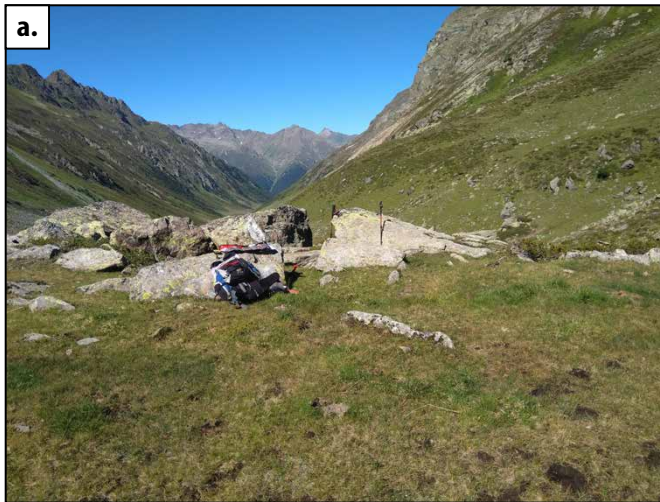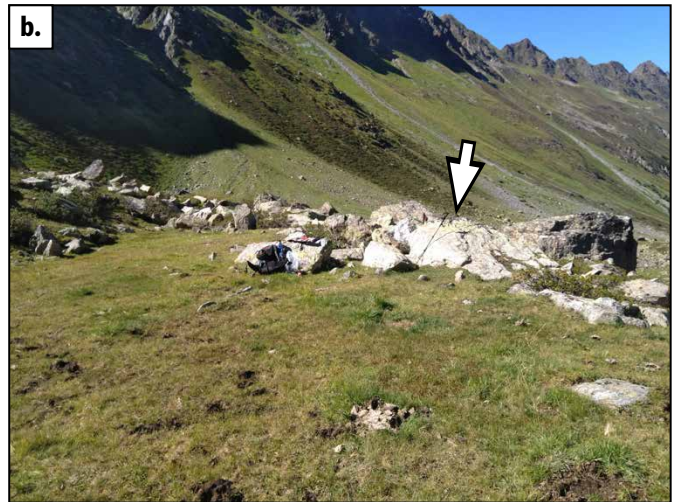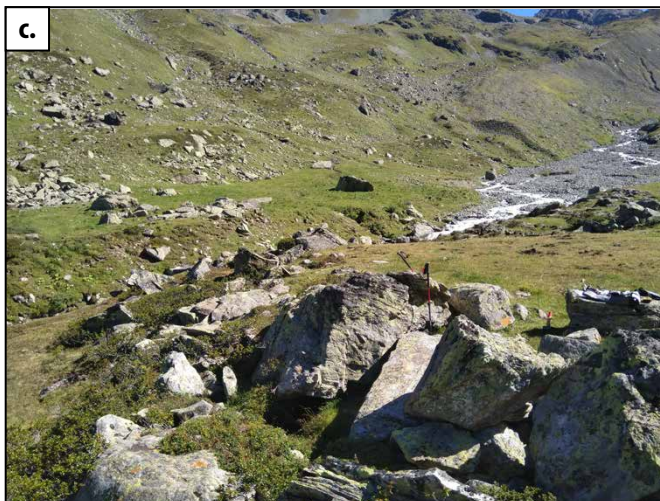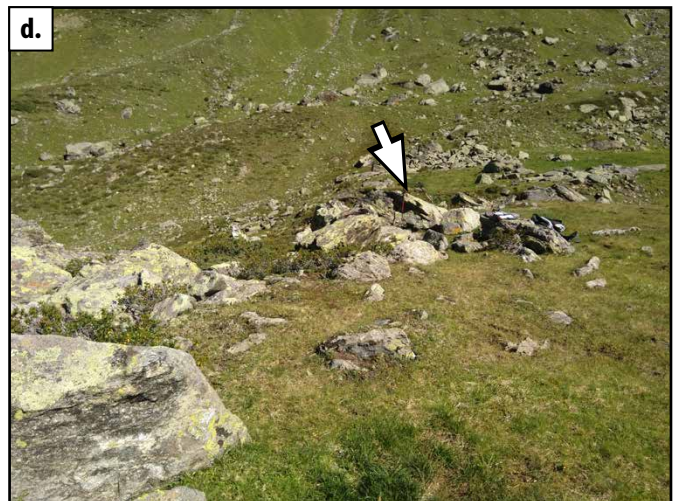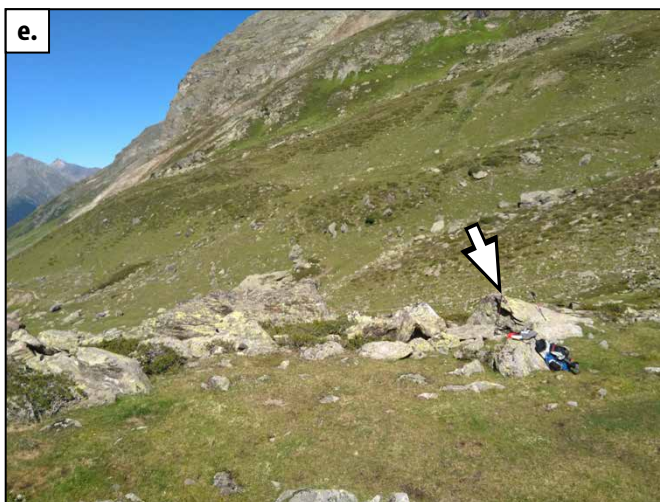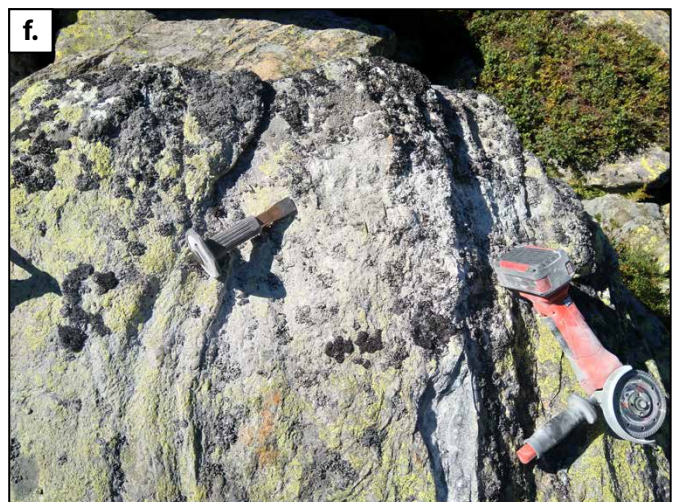

**Figure S22: LAR-19-19. a. View towards N. b. View towards NW. c. View towards SE with terminal section of L1 ridges in the background. d. View towards E. e. View towards NE. f. Sampled rock surface.**



COORDINATES N 46.9267 | E 10.2224  
ALTITUDE 2180 m  
L x B x H 0.8 x 1.6 x 1.5 m<sup>3</sup>

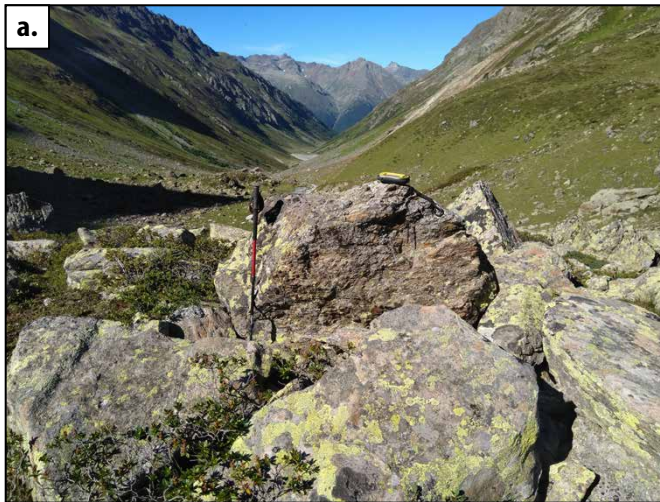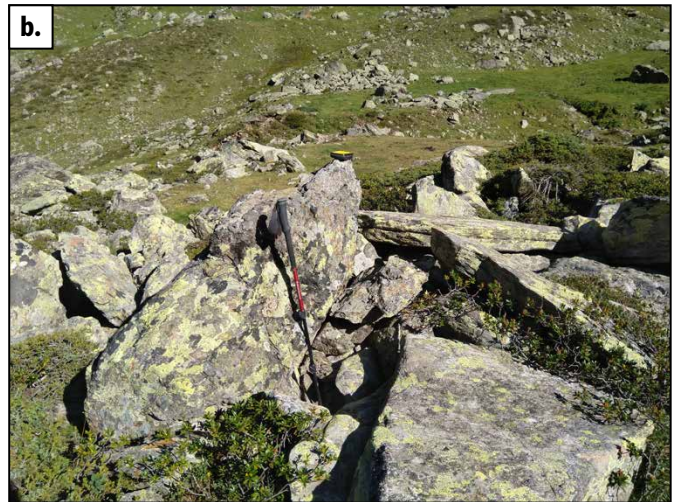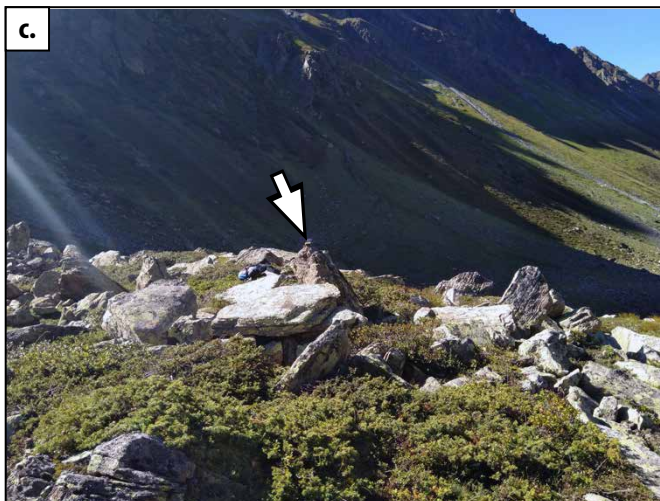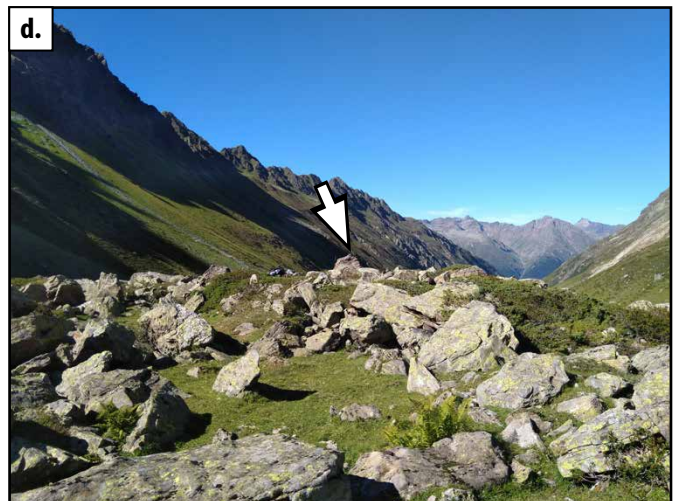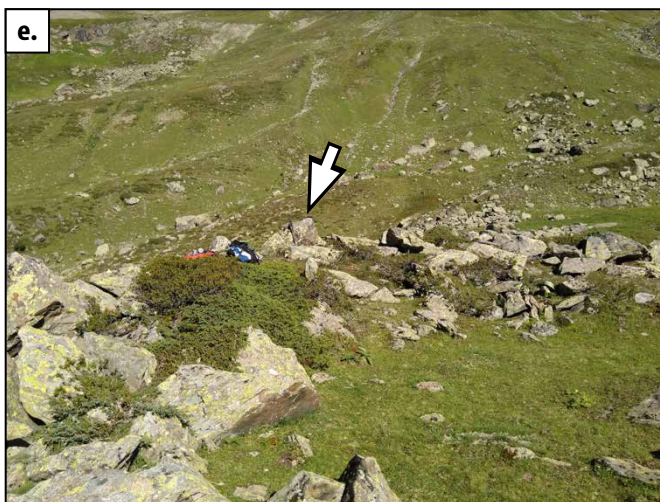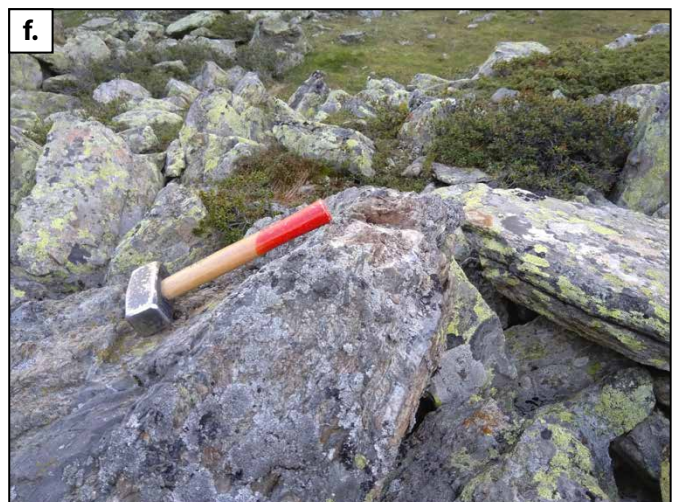

**Figure S23: LAR-19-20. a. View towards N. b. View towards E. c. View towards NW. d. View towards N. e. View towards E. f. Sampled rock surface.**



COORDINATES N 46.9273 | E 10.2222  
ALTITUDE 2160 m  
L x B x H 2.0 x 1.2 x 1.3 m<sup>3</sup>

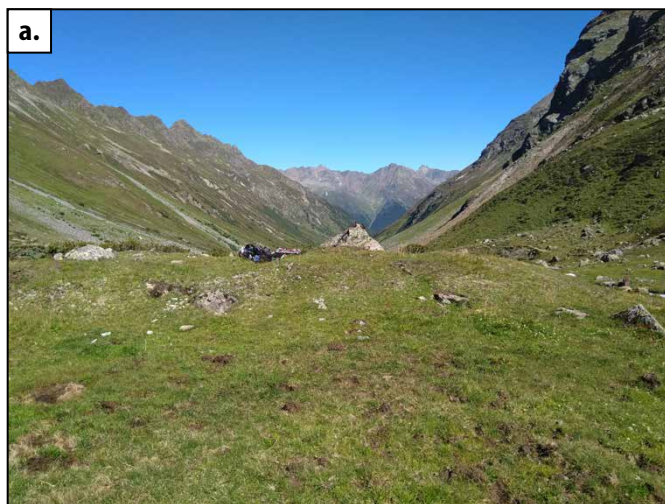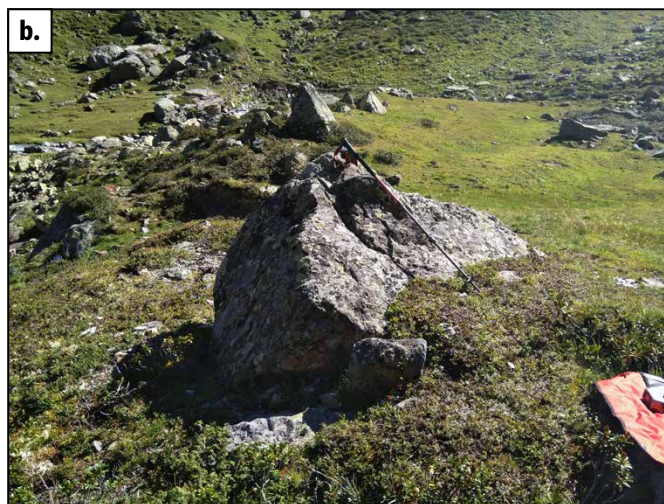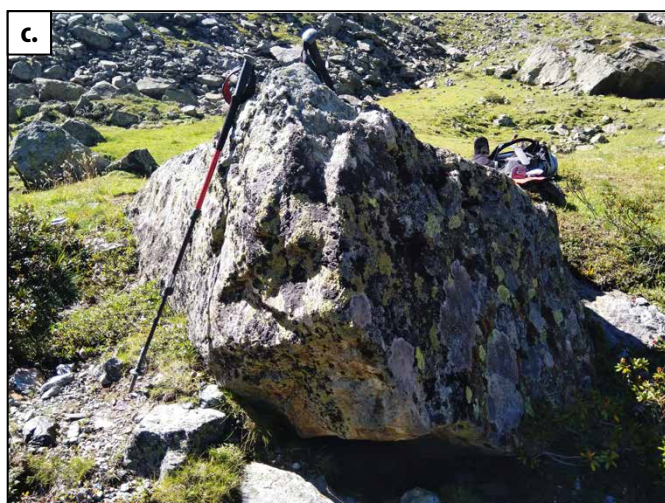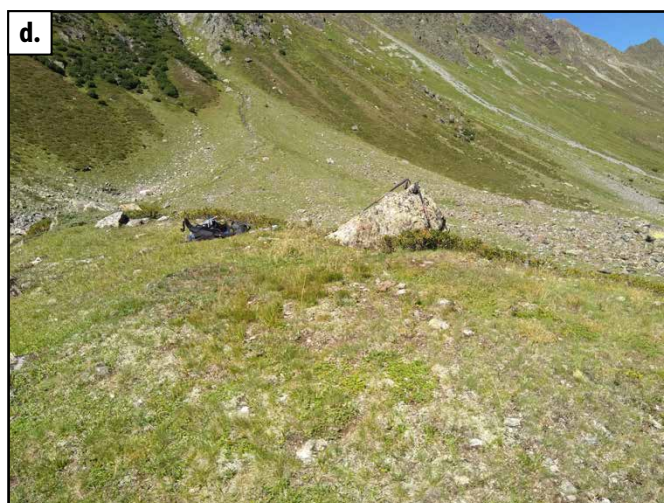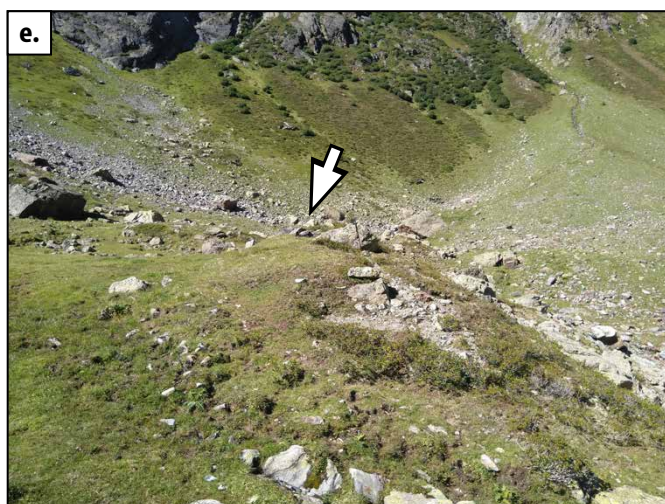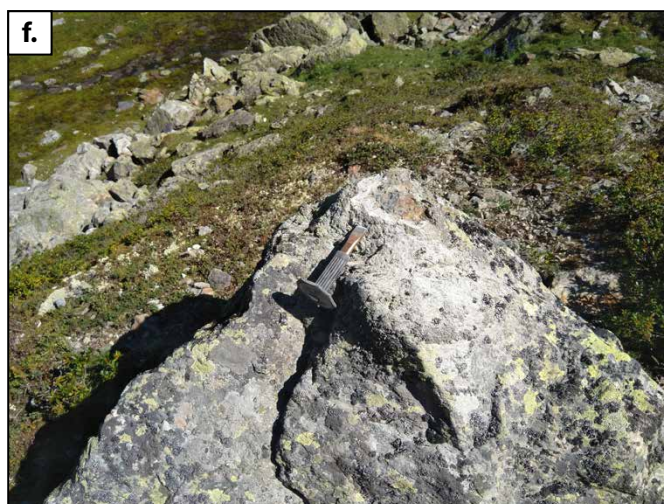

Figure S24: LAR-19-21. a. View towards N. b. View towards E. c. View towards NW. d. View towards N. e. View towards E. f. Sampled rock surface.



COORDINATES N 46.9245 | E 10.2213  
ALTITUDE 2256 m  
L x B x H 6.0 x 3.0 x 2.4 m<sup>3</sup>

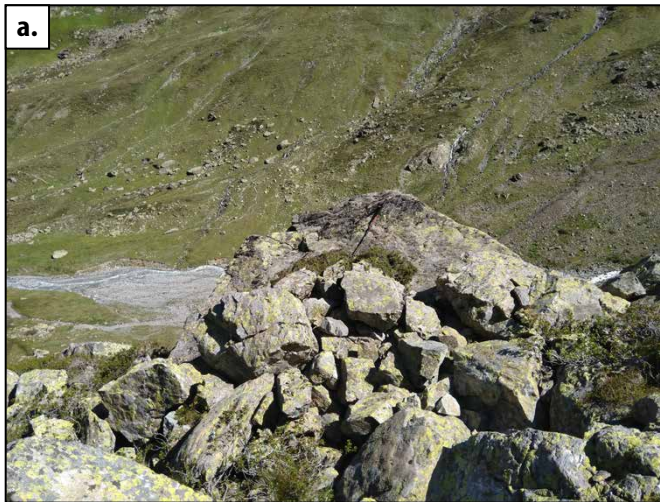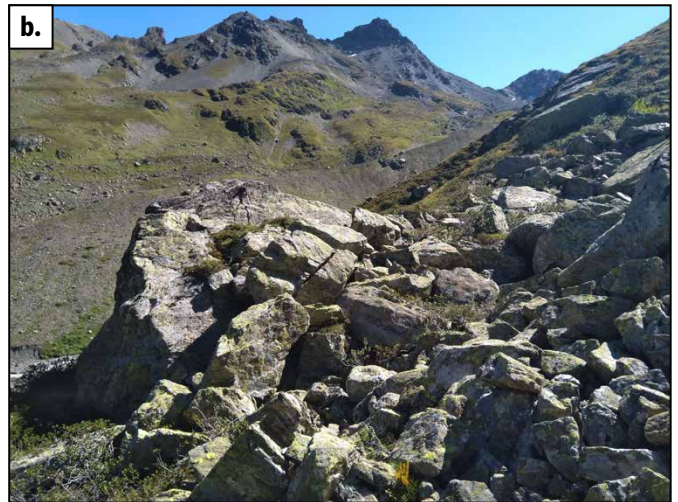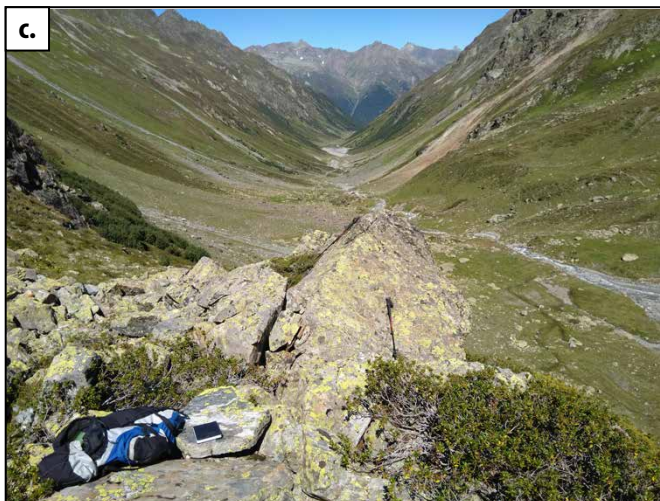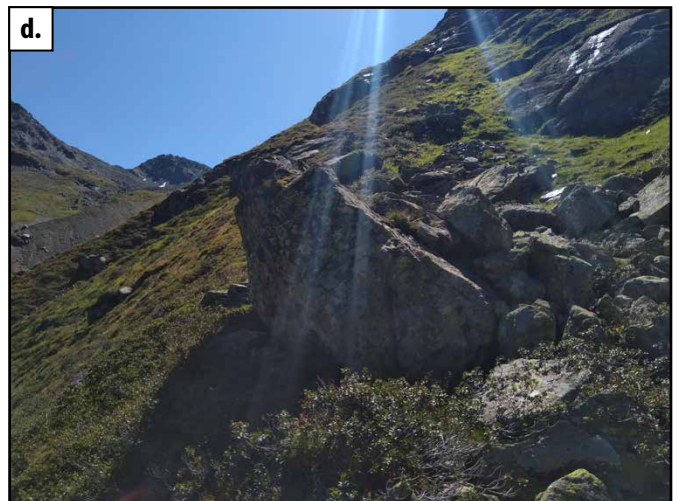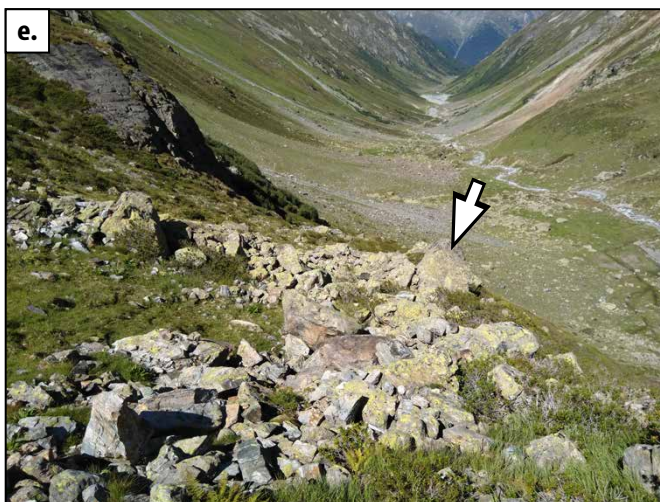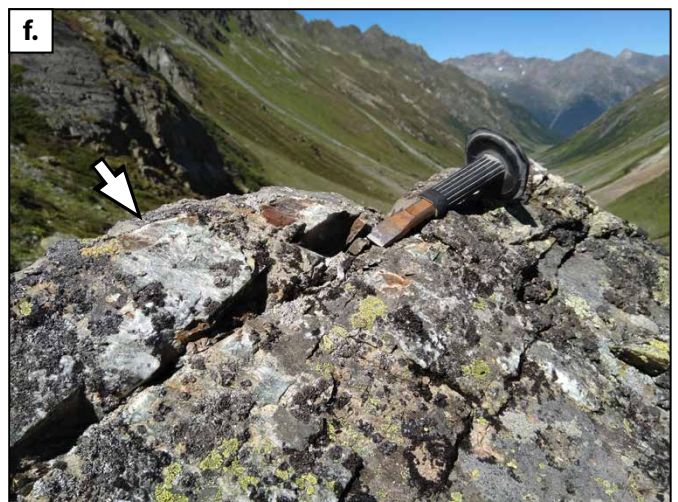

Figure S25: LAR-19-22. a. View towards E. b. View towards SE. c. View towards N with rockfall pathway (brown line in the upper-right quarter of the image); source area Hoher Kogel. d. View towards S. e. View towards N. f. Sampled rock surface indicated by arrow.



COORDINATES N 46.9234 | E 10.2216  
 ALTITUDE 2292 m  
 L x B x H 3.7 x 2.5 x 2.5 m<sup>3</sup>

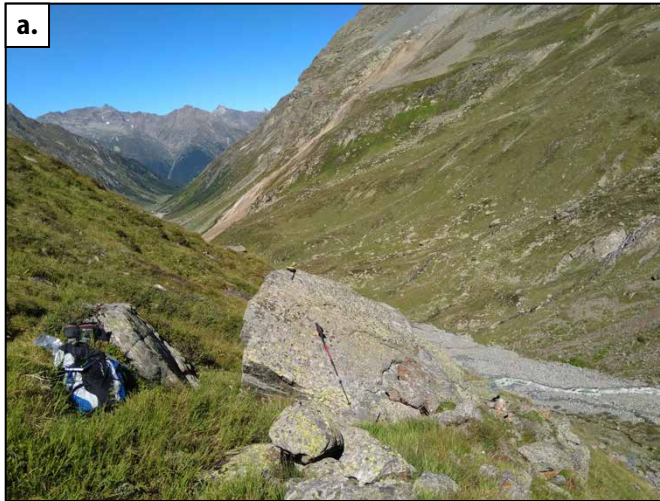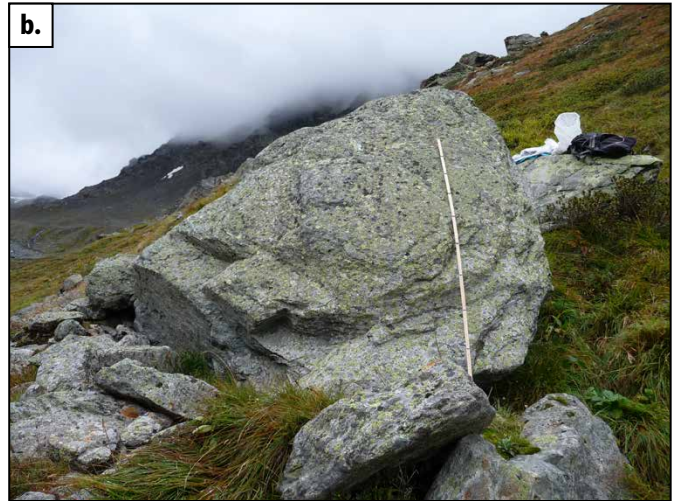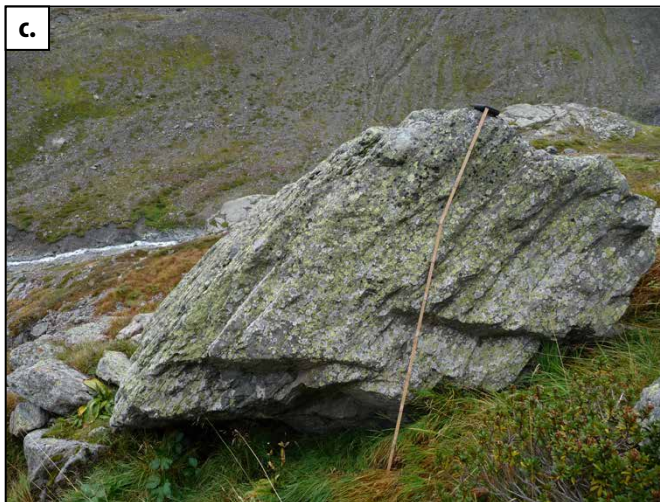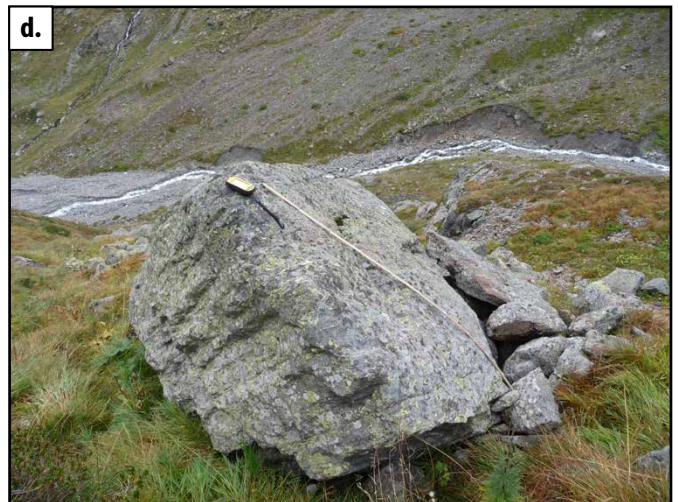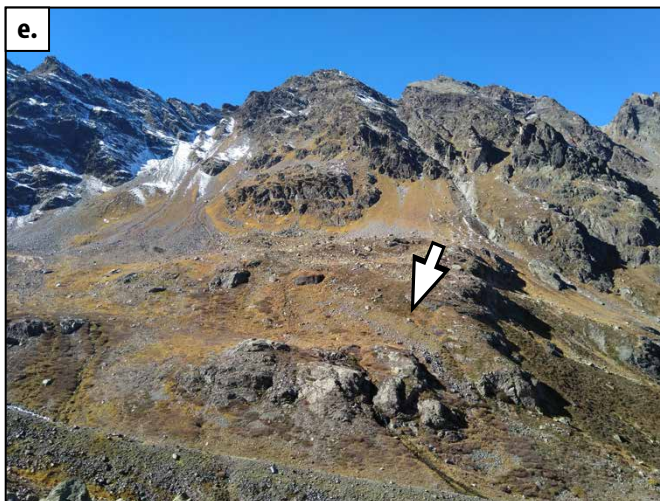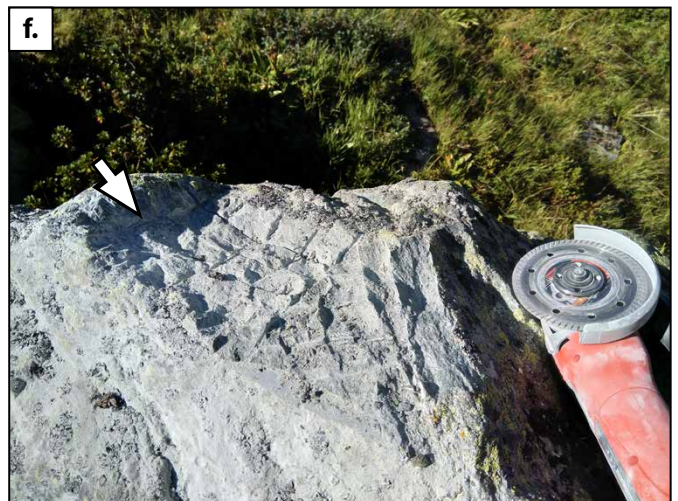

**Figure S26: LAR-19-23. a. View towards N. b. View towards SW. c. View towards E. d. View towards NE. e. View towards NNE. f. Sampled rock surface indicated by arrow.**



COORDINATES N 46.9225 | E 10.2201  
 ALTITUDE 2357 m  
 L x B x H 3.2 x 1.8 x 1.1 m<sup>3</sup>

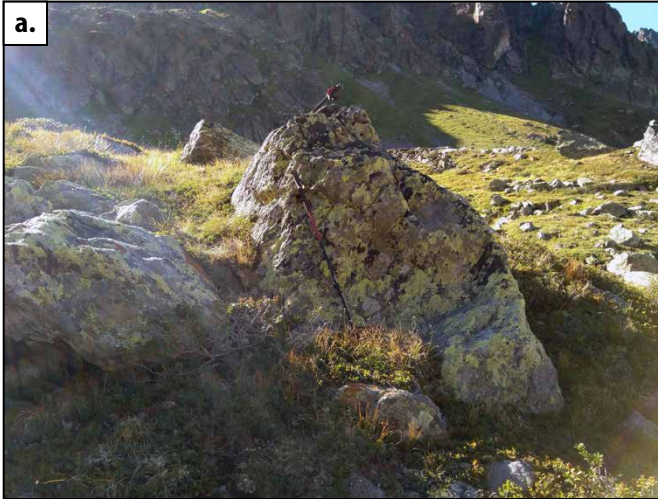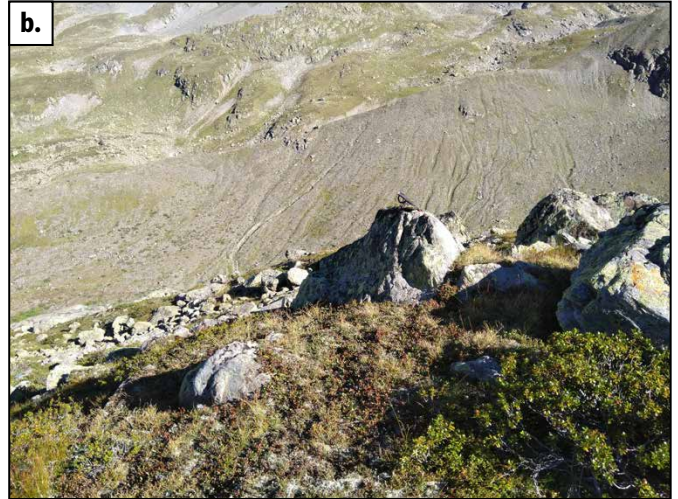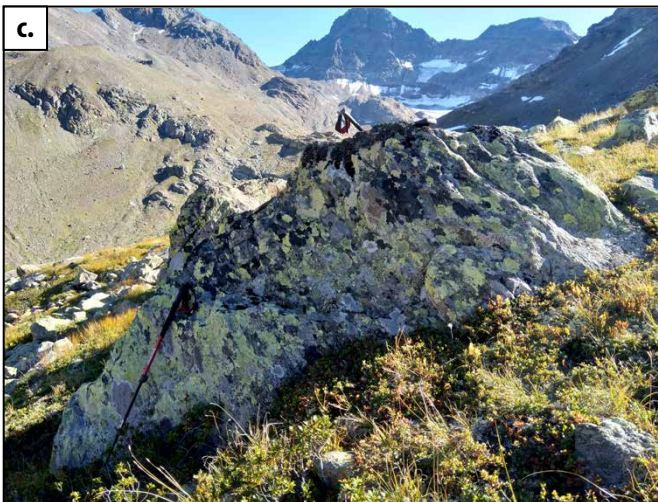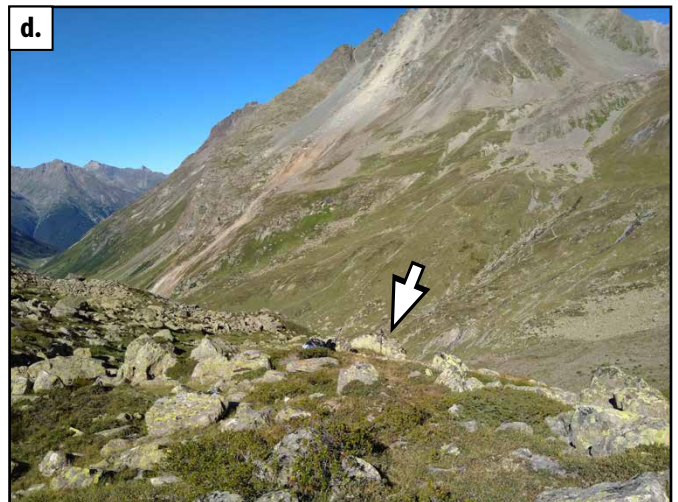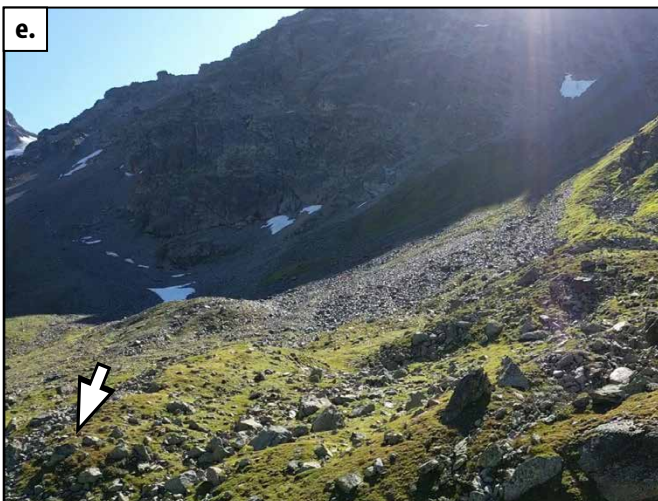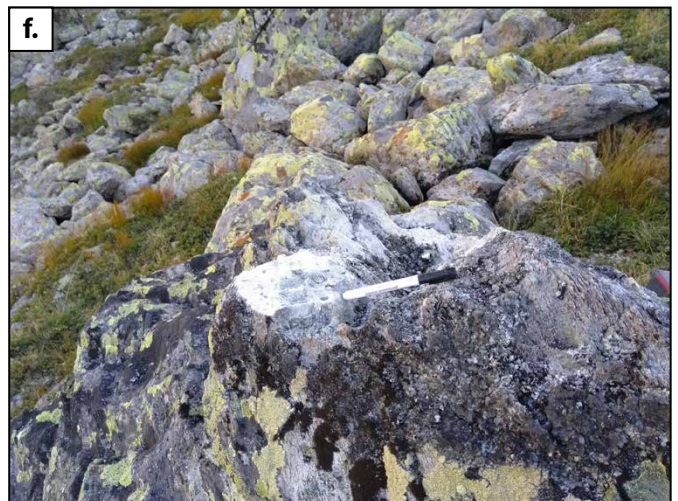

**Figure S27: LAR-19-24. a. View towards NW. b. View towards E. c. View towards S. d. View towards NE with recent rock fall channel in the background. e. View towards SW (drone footage). f. Sampled rock surface indicated by arrow (dipping quartz vene).**

## REFERENCES

- Balco, G., 2011. Contributions and unrealized potential contributions of cosmogenic-nuclide exposure dating to glacier chronology, 1990-2010. *Quaternary Sci Rev* 30, 3-27.
- Braumann, S.M., Schaefer, J.M., Neuhuber, S.M., Reitner, J.M., Lüthgens, C., Fiebig, M., 2020. Holocene glacier change in the Silvretta Massif (Austrian Alps) constrained by a new  $^{10}\text{Be}$  chronology, historical records and modern observations. *Quaternary Sci Rev* 245, 1-21.
- Schaefer, J.M., Denton, G.H., Kaplan, M.R., Putnam, A., Finkel, R.C., Barrell, D.J.A., Andersen, B.G., Schwartz, R., Mackintosh, A., Chinn, T., Schlüchter, C., 2009. High-Frequency Holocene Glacier Fluctuations in New Zealand Differ from the Northern Signature. *Science* 324, 622-625.
